1 ***The peptide GOLVEN10 controls nodule and lateral root organogenesis and***  
2 ***positioning along the longitudinal root axis***

3  
4 Sonali Roy<sup>1,2</sup> (0000-0002-8114-8300), Ivone Torres-Jerez<sup>1</sup> (0000-0001-9264-4652),  
5 Shulan Zhang<sup>1</sup>, Wei Liu<sup>1</sup> (0000-0003-4653-0448), Katharina Schiessl<sup>3</sup> (0000-0002-  
6 7694-0619), Clarissa Boschiero<sup>1</sup> (0000-0002-6575-5266), Hee-Kyung Lee<sup>1</sup> (0000-0002-  
7 3895-426X), Patrick X. Zhao<sup>1</sup> (0000-0002-3460-5564), Jeremy D. Murray<sup>4</sup> (0000-0003-  
8 3000-9199), Giles E. D. Oldroyd<sup>3</sup> (0000-0002-5245-6355), Wolf-Rüdiger Scheible<sup>1</sup>  
9 (0000-0003-4363-4196), Michael Udvardi<sup>1,5\*</sup> (0000-0001-9850-0828)

10

11 <sup>1</sup> Noble Research Institute, LLC., Ardmore, OK, 73401, USA

12 <sup>2</sup> Present Address: College of Agriculture, Tennessee State University, Nashville, TN  
13 37209, USA

14 <sup>3</sup> Sainsbury Laboratory, University of Cambridge, Cambridge CB2 1LR, UK

15 <sup>4</sup> Shanghai Institute of Plant Physiology and Ecology, Shanghai 200032, China

16 <sup>5</sup> Present Address: University of Queensland, Brisbane, AU

17

18 \* Corresponding author [m.udvardi@uq.edu.au](mailto:m.udvardi@uq.edu.au)

19

20 The author responsible for distribution of materials integral to the findings presented in  
21 this article in accordance with the policy described in the Instructions for Authors  
22 (<https://academic.oup.com/plcell/pages/General-Instructions>) is Michael Udvardi  
23 ([m.udvardi@uq.edu.au](mailto:m.udvardi@uq.edu.au)).

24

25 Plain Language Summary

26 Nodule positioning is an understudied trait, yet it determines the length of the root that  
27 can support nodule formation and consequently the total number of functional nodules  
28 formed. We identify for the first time, genetic factors called GOLVEN peptides that alter  
29 nodule and lateral root positioning on the primary root along with several other traits  
30 including nodule organ initiation and root architecture.

31

## 32 SUMMARY

- 33 • GLV/RGF peptide encoding genes can be identified in genomes of all plants that  
34 can form roots or root-like structures suggesting they were essential for transition of  
35 plants to land.
- 36 • In *Medicago truncatula*, five of fifteen GOLVEN(GLV)/ROOT MERISTEM GROWTH  
37 FACTOR (RGF) peptide coding genes were induced during nodule organogenesis  
38 and to a varying extent under nitrogen deficiency and auxin treatment. Expression  
39 of *MtGLV9* and *MtGLV10* at nodule initiation sites was dependent on the  
40 transcription factor NODULE INCEPTION.
- 41 • Overexpression of all five nodule-induced *GLV* genes in *M. truncatula* hairy roots as  
42 well as application of the corresponding synthetic peptides resulted in a 25-50%  
43 reduction in nodule number indicating GOLVENS are negative regulators of nodule  
44 organogenesis.
- 45 • The peptide GOLVEN10 shifted the position of the first formed lateral root  
46 (rhizotaxis) as well as the first formed nodule along the longitudinal primary root  
47 axis, a phenomenon we term 'nodulotaxis', thereby reducing the absolute length of  
48 the zone of lateral organ formation on roots.
- 49 • Application of synthetic GOLVEN10 peptide caused an increase in cell number but  
50 not cell length in each root cortical cell layer causing an increase in root length and  
51 a consequent spatiotemporal delay in formation of the first lateral organ.

52

## 53 KEYWORDS

54 GOLVEN, ROOT MERISTEM GROWTH FACTOR, peptide hormones, root nodule  
55 symbiosis, lateral root

56

## 57 INTRODUCTION

58

59 Root architectural responses to environmental cues such as availability of the  
60 macronutrient Nitrogen (N), are known to be complex and there is much to learn about  
61 the mechanisms that control root plasticity (Lynch, 2019). Changes in root system  
62 architecture involve priming, initiation and emergence of lateral organs that enable

63 plants to respond dynamically to fluctuations in supply and demand of water and  
64 nutrients (Laskowski & ten Tusscher, 2017). In legumes, the ability to form nodules, a  
65 second type of root lateral organ, which in association with rhizobia help convert  
66 atmospheric-N into plant usable ammonia, adds yet another layer of complexity (Roy *et*  
67 *al.*, 2020).

68  
69 Plant hormones, including peptide hormones, are major determinants of root plasticity  
70 that bring about their effects by synergistic and antagonistic interaction between  
71 signaling networks (Matsuzaki, Yo *et al.*, 2010; Meng *et al.*, 2012; Whitford *et al.*, 2012;  
72 Leyser, 2018; Zhu *et al.*, 2020; Roy & Muller, 2022). Peptide hormones are short chains  
73 of amino acids that upon binding with their cognate cell surface receptors initiate a  
74 signal relay that ultimately controls physiological responses (Roy & Muller, 2022). The  
75 biological activity of chemically synthesized peptides predicted from genome sequences  
76 has revolutionized the field of chemical genomics. This has led to the discovery of  
77 multiple novel peptide hormones and helped uncover their roles in plant growth and root  
78 development (Okuda *et al.*, 2009; Matsuzaki, Y. *et al.*, 2010; de Bang *et al.*, 2017). Two  
79 well-known families of peptide hormones, namely CLAVATA3/ENDOSPERM  
80 SURROUNDING REGION (MtCLE12, MtCLE13, MtCLE34, MtCLE35) and C-terminally  
81 ENCODED PEPTIDE (MtCEP1, MtCEP7), control lateral root and nodule development  
82 in *Medicago truncatula* (Mortier *et al.*, 2010; Imin *et al.*, 2013; Mens *et al.*, 2021; Moreau  
83 *et al.*, 2021). CEPs act as root-to-shoot 'N-hunger' signals controlling lateral root  
84 development and uptake of nitrogen in N-poor soils, while CLE peptides are perceived  
85 by the LEUCINE RICH REPEAT- RECEPTOR LIKE KINASE (LRR-RLK) receptor,  
86 SUPER NUMERIC NODULATION (SUNN) as part of a long-distance negative feedback  
87 loop called Autoregulation of Nodulation (AON) that restricts nodulation under N-replete  
88 conditions (Okamoto *et al.*, 2013; Roy *et al.*, 2020). Together these two pathways  
89 maintain an optimal N-balance and control nodule number in legumes (Laffont *et al.*,  
90 2020). Members of two additional families, PHYTOSULFOKINE (LjPSK8) and  
91 GOLVEN/ROOT GROWTH FACTOR/CLAVATA3 EMBRYO SURROUNDING REGION  
92 LIKE (MtGLV9/MtRGF3) have also been implicated as positive and negative regulators  
93 of nodule formation, respectively (Wang *et al.*, 2015; Li *et al.*, 2020).

94

95 The sulfated GOLVEN (GLV) peptides are known to control five root growth traits: cell  
96 number at the root meristem via activation of PLETHORA (PLT) transcription factors,  
97 which affects primary root growth (Matsuzaki, Y. *et al.*, 2010); cell division during lateral  
98 root initiation thereby controlling lateral root density and patterning (Meng *et al.*, 2012;  
99 Fernandez *et al.*, 2015; Fernandez *et al.*, 2020); auxin distribution via modulation of PIN  
100 efflux transporters thus regulating root gravitropism (Whitford *et al.*, 2012); root cell  
101 number and circumferential cell growth rate under phosphate deficiency (Cederholm &  
102 Benfey, 2015); and nodule number (Li *et al.*, 2020). At the molecular level, GLVs affect  
103 components of the auxin efflux transport pathway (PIN2) and auxin signaling (ARF7,  
104 ARF19) pathway and may reduce auxin concentrations at lateral root (LR) initiation sites  
105 (Whitford *et al.*, 2012; Fernandez *et al.*, 2020). Both nodule and lateral root formation  
106 are conditioned by changes in auxin flux and localized biosynthesis that lead to  
107 formation of local auxin maxima conducive for first cell divisions, organ initiation and  
108 outgrowth (Laskowski & ten Tusscher, 2017; Leyser, 2018). During nodule formation,  
109 this auxin buildup is associated with the transcription factor NODULE INCEPTION (NIN)  
110 (Schiessl *et al.*, 2019).

111

112 Chemically synthesized plant hormones such as Indole-3-Acetic acid (3-IAA) and 6-  
113 Benzyl-Aminopurine (6-BAP) are instrumental in elucidating physiological roles of the  
114 classical hormones auxin and cytokinin, respectively (Michniewicz *et al.*, 2019).  
115 Chemical genetics and synthetic peptides are equally valuable for understanding the  
116 role of peptide hormones in plant responses to their environment. Notably, discovery of  
117 LURE peptide, CEP peptide, and CLE peptide activity were all facilitated by their  
118 synthetic counterparts (Okuda *et al.*, 2009; Goto *et al.*, 2011; Corcilius *et al.*, 2017;  
119 Laffont *et al.*, 2020). The model legume *M. truncatula* has over 1800 potential genome  
120 encoded peptides, of which less than twenty have been functionally characterized (de  
121 Bang *et al.*, 2017; Boschiero *et al.*, 2020). Research on symbiotic nitrogen fixation in  
122 legumes over the past 20 years has focused on three main areas, including rhizobial  
123 infection (structure and number of infection threads), nodule organogenesis  
124 (morphology and number of nodules) and N-fixation rates (measured by acetylene

125 reduction assays) (Roy *et al.*, 2020). These processes have been investigated through  
126 forward and reverse genetics. An understudied aspect of root nodule symbiosis is  
127 control of nodule positioning. Penmetsa *et al.*, observed that the position of nodule  
128 development relative to xylem and phloem poles were altered in *Medicago sickle* and  
129 *sun* mutants (Penmetsa *et al.*, 2003). Another hypernodulation mutant, *Ljplenty*,  
130 exhibited a wider zone along the primary root over which nodules were formed (Yoshida  
131 *et al.*, 2010). In the current study, we investigated the biological role of nodule-induced  
132 GLVs and found that they decrease the length of the nodulation zone by altering nodule  
133 positioning along the primary root axis. We term this phenomenon ‘nodulotaxis’, by  
134 analogy to the term ‘rhizotaxis’ that describes the arrangement or positioning of lateral  
135 roots along the primary root, which we also find to be under the influence of the GLV10  
136 peptide.

137

## 138 **MATERIALS AND METHODS**

139

### 140 **Plant material, nodulation assays and growth conditions**

141 *Medicago truncatula* ecotype Jemalong A17 or R108 were used in this study. All *Tnt1*  
142 mutants are in the R108 background. *Tnt1* lines isolated include *glv10-1* (NF12742),  
143 and *glv10-2* (NF20983). Seeds were scarified with concentrated H<sub>2</sub>SO<sub>4</sub>, and surface  
144 sterilized with undiluted household bleach (Clorox) at 8% sodium hypochlorite and sown  
145 on 1% water agarose (Life Technologies Catalog: 16500100) plates.

146

147 Seeds were stratified at 4°C for three days in dark prior to overnight germination at 24°C  
148 and then transferred onto agarose plates containing B&D nutrients (Broughton &  
149 Dilworth, 1971) plus 0.5 mM KNO<sub>3</sub> with and without peptides. Eight to ten seedlings per  
150 line were placed on each plate between sterile filter paper sheets for all experiments  
151 except the GWAS screen in which we placed three seedlings per plate. For experiments  
152 in soil, overnight germinated seedlings were transferred to a 2:1 mixture of  
153 surface:vermiculite. Plants were watered B&D solution containing six millimolar nitrogen  
154 before inoculation with rhizobia at seven days post germination. Post Inoculation, plants  
155 were subsequently watering with B&D nutrient media supplemented with 0.5 mM

156 Potassium Nitrate. All experiments were conducted in a controlled environment  
157 chamber at 24°C under 16 hours light, eight hours dark conditions.

158  
159 *Arabidopsis thaliana* wild type Col-0 or mutant lines were sterilized using bleach and  
160 70% ethanol. After stratification for 3 days at 4° C, seeds were placed onto ½ MS  
161 (Murashige & Skoog) media plates with or without peptide and allowed to grow for 14  
162 days. All plants were scored on the same day under a 4x Leica S7 microscope.

163

### 164 **Cloning of promoters and CDS for hairy root**

165 Gene coding regions were cloned either using Golden gate technology or the Gibson  
166 assembly method. Promoter regions of *MtGLV1* (1392 bps), *MtGLV2* (2883 bps),  
167 *MtGLV6* (2131 bps), *MtGLV9* (2192 bps), were cloned upstream of the β-  
168 Galactouronidase (GUS) gene in MU06 vector carrying a DsRed selection cassette  
169 using Gibson assembly method (Gibson *et al.*, 2009). The *MtGLV10* endogenous  
170 promoter was synthesized (3000 bps) and cloned upstream of the GUS gene using  
171 Golden Gate cloning. All clones were verified by sanger sequencing before  
172 transformation into *M. truncatula* hairy roots mediated by *Agrobacterium rhizogenes*  
173 Arqua1 (Quandt *et al.*, 1993). All cloned CDS using golden gate cloning (MtGLV1,  
174 MtGLV9, MtGLV10) and Gibson cloning (MtGLV2, MtGLV6) were cloned downstream of  
175 the Lotus *UBIQUITIN* promoter. Sequenced clones are available from Addgene under  
176 the deposit ID 79021.

177

### 178 **Hairy root transformation**

179 A streptomycin resistant strain of *A. rhizogenes* Arqua1 was transformed with constructs  
180 of interest carrying a *AtUBI:dsred* selection marker and cultured on LB medium agar  
181 plates supplemented with the corresponding antibiotics for two days at 28°C,  
182 Agrobacteria were scraped off the plates using sterile spreaders and resuspended using  
183 500-700 µL of sterile water. Root tips from overnight germinated seedlings were cut off  
184 to ensure that the meristem was completely removed and the cut end dipped in  
185 aforementioned bacterial suspension. Seedlings were transferred to and grown on  
186 modified Fahraeus medium plates for two weeks at 24°C 16 hours day and 8 hours

187 night conditions. Transgenic calli expressing dsRed were selected using an Olympus  
188 SZX microscope and transferred to soil.

189

### 190 **Histochemical localization of GUS and $\beta$ -Gal staining**

191 For X-gluc staining, X-GlcA ((5-bromo-4-chloro-3-indolyl-beta-D-glucuronic acid,  
192 Goldbio) in DMF (Dimethyl formamide)) was added to 50 ml of phosphate buffer (100  
193 mM phosphate buffer saline with 100 mM Na<sub>2</sub>HPO<sub>4</sub>, NaH<sub>2</sub>PO<sub>4</sub> each) and 50 mM  
194 K<sub>4</sub>FeCN<sub>6</sub> and K<sub>3</sub>FeCN<sub>6</sub> each, 0.5M EDTA and 10% Triton X-100. X-gluc was added to a  
195 final concentration of 100 mg/100 mL buffer. Harvested root tissue were vacuum  
196 infiltrated with the X-Gluc solution for 10 minutes and then incubated at 37 °C in dark for  
197 varying time periods. Two distinct GUS staining times were used for each construct at  
198 early nodulation time points (4 dpi, 10 dpi) and 28 dpi. These were *MtGLV1* (2 hrs, 2  
199 hrs), *MtGLV2* (24 hrs, 24 hrs), *MtGLV6* (24 hrs, 12 hrs), *MtGLV9* (4 hrs, 4 hrs),  
200 *MtGLV10* (24 hrs, 4 hrs), *MtD14* (6 hrs, 6 hrs), *MtSPL5* (6 hrs, 24 hrs) and *MtMAKRL*  
201 (24 hrs, 6 hrs). At 28 dpi, nodules were excised and cleared with 1/20 strength bleach  
202 overnight and imaged.

203

204 Samples were washed in phosphate buffer three times before staining rhizobia with X-  
205 gal (Goldbio). Prior to X-gal (5-bromo-4-chloro-3-indolyl- $\beta$ -D-galactopyranoside)  
206 staining, tissue was fixed in 2.5% glutaraldehyde by vacuum infiltration for ten minutes  
207 followed by a one-hour incubation time. Samples were rinsed with Z-buffer (100 mM  
208 Na<sub>2</sub>HPO<sub>4</sub> and NaH<sub>2</sub>PO<sub>4</sub> each, 10 mM Potassium chloride and 1 mM Magnesium  
209 chloride) and immediately transferred to the X-gal solution in Z-buffer (50mM each  
210 K<sub>4</sub>FeCN<sub>6</sub> and K<sub>3</sub>FeCN<sub>6</sub>, 4% X-gal in DMF). Tissue was vacuum infiltrated, incubated  
211 in the dark overnight and imaged the next day.

212

### 213 **Hormone Treatments and Nodule excision**

214 Peptides synthesis was carried out by Pepscan and Austin Chemicals, Inc. For auxin  
215 treatments, overnight germinated *M. truncatula* seedlings were transferred onto 1%  
216 water agarose media and grown for three days at 24°C. Sixty to seventy seedlings were  
217 transferred to sterile water (pH adjusted to 6.8) containing 1  $\mu$ M Indole-3-acetic acid or

218 equivalent amount of DMSO (Dimethoxy sulfoxide – solvent control) and treatment  
219 allowed to proceed for three hours. Post treatment for three hours, roots were excised  
220 from 20 seedlings per replicate per biological replicate and shoots discarded. For  
221 variable-N treatments, seedlings were grown for three days on B&D media with six mM  
222 nitrogen before transfer to liquid B&D medium at two different N-concentrations.  
223 Solution designated as Full-N constituted six mM nitrogen (Final concentration 0.5 mM  
224  $\text{KH}_2\text{PO}_4$ , 0.25 mM  $\text{K}_2\text{SO}_4$ , 0.25 mM  $\text{MgSO}_4$ , .01 mM Fe-citrate, 1 mM  $\text{CaCl}_2$ , 2 mM  
225  $\text{KNO}_3$ , 2 mM  $\text{NH}_4\text{NO}_3$ , pH 6.8) while Low-N solution contained a limited amount of  
226 nitrogen, prepared without any  $\text{NH}_4\text{NO}_3$  and only 0.5 mM  $\text{KNO}_3$ .

227

### 228 **RNA Extraction, complimentary DNA synthesis and quantitative PCR**

229 Total RNA was extracted using Trizol Reagent (Life Technologies) following the  
230 manufacturer's recommendations (Invitrogen GmbH, Karlsruhe, Germany), digested  
231 with RNase free DNase1 (Ambion Inc., Houston, TX) and column purified with RNeasy  
232 MinElute CleanUp Kit (Qiagen). RNA was quantified using a Nanodrop  
233 Spectrophotometer ND-100 (NanoDrop Technologies, Wilmington, DE). RNA integrity  
234 was assessed on an Agilent 2100 BioAnalyser and RNA 6000 Nano Chips (Agilent  
235 Technologies, Waldbronn, Germany). First-strand complementary DNA was  
236 synthesized by priming with oligo-dT<sub>20</sub> (Qiagen, Hilden, Germany), using Super Script  
237 Reverse Transcriptase III (Invitrogen GmbH, Karlsruhe, Germany) following  
238 manufacturer's recommendations. Primer Express V3.0 software was used for primer  
239 design. qPCR reactions were carried out in an QuantStudio7 (ThermoFisher Scientific  
240 Inc.). Five microliters reactions were performed in an optical 384-well plate containing  
241 2.5  $\mu\text{L}$  SYBR Green Power Master Mix reagent (Applied Biosystems), 15 ng cDNA and  
242 200 nM of each gene-specific primer. Transcript levels were normalized using the  
243 geometric mean of two housekeeping genes, *MtUBI* (Medtr3g091400) and *MtPTB*  
244 (Medtr3g090960). Three biological replicates were included and displayed as relative  
245 expression values. Primer sequences are provided in **Supplemental Table 3**.

246

### 247 **Root Embedding and Sectioning**



248 One cm root segments were fixed with 5 % glutaraldehyde in Phosphate Buffer Saline  
249 (pH = 7.2) solution overnight. Samples were rinsed three times and dehydrated using  
250 ethanol gradients (20 %, 40 %, 60 %, 80 % and 100 %). The samples were embedded  
251 in Technovit 7100 (Heraeus-Kulzer, Wehrheim, Germany), according to the  
252 manufacturer's protocol. Samples were sectioned to 2.5  $\mu$ m thickness using a  
253 microtome and stained with Toluidine blue for 1 min or till the desired color intensity  
254 developed and rinsed three times before imaging.

255

### 256 **Statistical Analysis**

257 All statistical analyses were performed using GraphPad Prism 8 and tests selected  
258 therein. A two-sided Student's t-test was used for comparison between genotypes or  
259 treatments. For multiple genotypes ordinary one-way analysis of variance tests or the  
260 Brown-Forsythe and Welch tests were performed followed by post-hoc statistical tests  
261 as mentioned.

262

### 263 **Figure Preparation and R packages used**

264 Figures were prepared using Adobe Illustrator Creative cloud. Images were edited using  
265 Adobe Photoshop and FIJI. Graphs were prepared using GraphPad Prism 8.

266 Phylogenetic tree was prepared using Mega X and the FigTree Application. All default  
267 plots were edited using Adobe Illustrator for clarity.

268

### 269 **Phylogenetic Tree Construction**

270 Orthologs of GLV peptide encoding genes were retrieved from 18 different species by  
271 performing a Smith-Waterman search with SSearch(Ropelewski *et al.*, 2003), and e-  
272 values of  $\leq 0.01$  were used for significant homologies followed by manual BLAST  
273 searches. Both the full protein as well as the short peptide coding region of known  
274 peptides in Arabidopsis and Medicago were used to initiate these searches. Retrieved  
275 sequences were selected through the SSP classification pipeline on  
276 MtSSPdb.noble.org. A maximum likelihood phylogenetic tree of the resulting list of  
277 putative GLV peptide coding proteins was generated using Mega X software and 1000

278 bootstrap iterations performed. Consensus tree was modified using Figtree and Adobe  
279 Illustrator.

280

## 281 RESULTS

282

### 283 **Members of the GOLVEN peptide family are transcriptionally regulated by auxin,** 284 **plant nitrogen-status, nodule organogenesis and the transcription factor NIN**

285

286 By combining publicly available gene expression data from nodule segments at 4, 10,  
287 21 and 28 days post inoculation (dpi) (de Bang *et al.*, 2017; Boschiero *et al.*, 2020) and  
288 quantitative reverse transcription PCR (qRT-PCR), we found that five of the fifteen  
289 members of the GOLVEN/ROOT MERISTEM GROWTH FACTOR (GLV/RGF) family,  
290 namely *MtGLV1*, *MtGLV2*, *MtGLV6*, *MtGLV9* and *MtGLV10* are more highly expressed  
291 in nodules than in roots at all nodulation stages analyzed (**Figure 1a, Supplemental**  
292 **Figure S1**). Three of these genes were induced by short term N-deprivation stress (0.5  
293 mM NO<sub>3</sub><sup>-</sup>) compared to 6 mM N (4 mM NO<sub>3</sub><sup>-</sup> + 2 mM NH<sub>4</sub><sup>+</sup>) for 48 hours but not if the  
294 treatments were allowed to proceed longer (**Figure 1a, Supplemental Figure S1**).

295

296 Establishment of localized auxin maxima is required for lateral organ formation, and  
297 during nodulation is dependent on the transcription factor NODULE INCEPTION (NIN)  
298 (Leyser, 2018; Schiessl *et al.*, 2019). Since GLVs act by altering auxin transport and  
299 signaling in Arabidopsis roots (Whitford *et al.*, 2012; Fernandez *et al.*, 2020), we tested  
300 whether their expression is regulated by auxin. Four of the five nodule-enhanced GLVs  
301 were upregulated in seedling roots treated with 1 μM Indole-3-acetic acid (3-IAA) three  
302 hours post treatment (**Figure 1b**). Further, expression data in MtSSPdb.noble.org show  
303 that *MtGLV9* and *MtGLV10*, but not other GLVs are induced in nodule primordia at 1  
304 dpi. Using spot inoculated root segments infected with *Sinorhizobium meliloti* strain  
305 2011 (Sm2011) for 24 hours, we detected that *MtGLV9* and *MtGLV10* transcripts were  
306 induced at nodule initiation sites in WT but not in *nin-1* mutants, indicating that induction  
307 of these genes is dependent on NIN (**Figure 1c**). These data suggest that expression of

308 GLVs at nodule initiation sites occurs in a NIN dependent manner (Huo *et al.*, 2006; Roy  
309 *et al.*, 2017; Schiessl *et al.*, 2019).

310

311 **Overexpression of five nodule induced *GOLVEN* genes negatively regulates**  
312 **nodule number**

313

314 Spatial expression patterns obtained using promoter-GUS fusions in transgenic nodules  
315 corroborated the qRT-PCR data (**Figure 1**). The five *GLV* genes showed overlapping  
316 patterns of expression at sites of nodule initiation associated with successful infections  
317 and cell divisions suggesting they might act redundantly during nodule formation  
318 (**Figure 2**). Of the five genes, *MtGLV10* had the most confined expression pattern,  
319 being restricted to dividing cells underlying infection sites, while expression of *MtGLV1*,  
320 *MtGLV2* was associated with nodule vascular bundles closer to the nodule meristem  
321 (**Figure 2a, Supplemental Figure S1**). None of the five genes were expressed in  
322 infected root hairs (**Figure 2a, Supplemental Figure S1**). In mature nodules,  
323 expression of the GLVs was confined to the meristem, typical of genes involved in  
324 meristem maintenance as in *Arabidopsis* (Fernandez *et al.*, 2015). We observed a  
325 similar but non-overlapping expression pattern of all five *GLVs* in initiating lateral roots  
326 (LRs) and the root tip. *MtGLV1* and *MtGLV10* were expressed in all dividing cells of the  
327 LR while *MtGLV2*, *MtGLV6*, *MtGLV9* were expressed on the flanks of LR primordia. At  
328 the root tip, *MtGLV9* and *MtGLV10* were expressed in columella cells, *MtGLV1*,  
329 *MtGLV2* were expressed in root cap cells and *MtGLV6* was expressed in the lateral root  
330 cap cells (**Figure 2a**).

331

332 To determine effects of GLV peptides on nodulation, we cloned the coding regions of  
333 *MtGLV1*, *MtGLV2*, *MtGLV6*, *MtGLV9* and *MtGLV10*, downstream of the Lotus  
334 *UBIQUITIN* promoter and generated transgenic hairy roots, via *Agrobacterium*  
335 *rhizogenes*-mediated transformation (Maekawa *et al.*, 2008). We included a clone with a  
336 single base pair deletion in the coding region of *MtGLV9* (+203 bps from ATG) as a  
337 negative control along with an empty vector overexpressing the *GUS* gene. Consistent  
338 with peptide effects, overexpression of the *GLV* genes reduced the number of nodules

339 formed on transformed roots 21 dpi by 25-50% (**Figure 2b, Supplemental Figure S4**).  
340 *MtGLV9* and *MtGLV10* had the strongest inhibitory effects on nodulation whereas the  
341 mutated *mMtGLV9* had no significant effect on nodulation.

342

### 343 **GOLVEN peptide encoding genes are present in genomes of all plants that form** 344 **roots or root-like organs**

345

346 To investigate neofunctionalization of these *GLV* genes in legumes, we retrieved their  
347 orthologues from twenty-one species of the Fabales, Fagales, Cucurbitales, Rosales  
348 nodule-forming eurosids, the rosid and asterid clades of the eudicots as well as  
349 monocots, gymnosperms and basal lycophytes, bryophytes and chlorophytes (**Figure 3,**  
350 **Supplemental Table S1**). All five nodulation-induced GLVs had putative orthologues in  
351 non-nodulating plant species suggesting no specialized roles during nodulation.  
352 However, although the *GLV* genes were present in plants that form roots or rhizoids,  
353 they were completely absent in the chlorophytes, which lack roots, such as  
354 *Chlamydomonas reinhardtii*, suggesting an evolutionary role in land colonization  
355 (**Figure 3**), (Furumizu *et al.*, 2021). In contrast with Furumizu *et al.*, we did find putative  
356 GOLVEN orthologues in the lycophyte representative *Selaginella moellendorffii*  
357 genome, encoding putative thirteen amino acid long bioactive peptides (**Figure 3,**  
358 **Supplementary Table 1**). The lycophyte clade is the most ancient clade with rooting  
359 plants.

360

### 361 **Synthetic GOLVEN peptides regulate ten of eighteen root growth parameters** 362 **tested**

363

364 To determine if externally applied synthetic peptides phenocopied GLV function *in*  
365 *planta* we took a chemical genetics approach to explore the role of GLVs in root nodule  
366 symbiosis and control of root architecture traits. We synthesized peptide variants and  
367 measured their effects on root growth parameters and nodulation traits to identify the  
368 synthetic peptide with the strongest, most reproducible effects for further investigative  
369 studies. Peptides predicted to be encoded at the C-terminal domain of *MtGLV1*,

370 *MtGLV2*, *MtGLV6*, *MtGLV9* and, *MtGLV10*, immediately following the peptidase  
371 cleavage recognition motif 'DY' were synthesized (**Supplemental Figure S3**).  
372 Phenotypic effects of the peptides GLV1p, GLV2p, GLV6\_hyp9p, GLV6\_hyp10p,  
373 GLV9p, and GLV10p carrying a modified sulfotyrosine at position two, applied at 1  $\mu$ M  
374 concentration, were distinct from those of scrambled, unmodified and unsulfated  
375 GLV10p, and solvent controls (**Figure 2A, B**). These results reinforce previous studies  
376 that show sulfation of the tyrosine at position two is essential for GOLVEN peptide  
377 activity (Matsuzaki, Y. *et al.*, 2010).

378  
379 GLV peptides significantly affected at least ten of the eighteen root growth parameters  
380 we tested (**Supplemental Table S2**). As in *Arabidopsis*, GLV peptides had a positive  
381 effect on primary root growth/length (**Figure 2A**) and rendered the roots agravitropic to  
382 varying degrees with effects of GLV10p being the most visually distinctive  
383 (**Supplementary Figure S4, Figure 4a**) (Matsuzaki, Y. *et al.*, 2010; Meng *et al.*, 2012;  
384 Whitford *et al.*, 2012). In contrast to their positive effects on root length, GLV1p, GLV2p,  
385 GLV6\_hyp9p, GLV6\_hyp10p, GLV9p, and GLV10p had negative effects on lateral  
386 organs, i.e., LRs and nodules, including organ number and density along the primary  
387 root (**Figure 4b, Supplemental Figure S3**). Clustering analysis of all traits revealed that  
388 GLV9p and GLV10p were the closest in terms of effects on root growth phenotypes  
389 (**Figure 4b**). Peptides did not affect *R. meliloti* Rm2011 growth rates over 60 hours  
390 indicating that nodulation phenotypes were due to effects on the plant and not its  
391 microsymbiont (**Supplemental Figure S3**). Interestingly, the position of the most basal  
392 nodule (closest to the shoot-root junction, developmentally oldest nodule, Trait 16)  
393 relative to the primary root length shifted upon GLVp treatment as nodules initiated  
394 more distally on the primary root (**Figure 4c**). However, because application of the GLV  
395 peptides reduced the total number of nodules formed. On the other hand, the more  
396 distal absolute position of the first formed nodule was highly consistent upon GLV10p  
397 application and resulted in a reduced absolute length of the zone over which nodules  
398 initiated (Trait 18) (**Figure 4c, Figure 5**).

399

400 Since nodulation and rhizobial infections are genetically distinct processes, we tested  
401 effects of the peptides on early infection structure development. GLV peptides reduced  
402 the total root length, including secondary and tertiary LRs, as well as the total number of  
403 early infection events (**Supplemental Figure S2**). However, the GLVs did not affect  
404 early infection initiation events per cm root, except for GLV10p, which resulted in more  
405 microcolonies and infection thread initiations, but a strong reduction in nodule formation  
406 (**Supplemental Figure S2**). Increased infection induced by GLV10p may have been a  
407 consequence of the severe reduction of nodule number, as observed for symbiotic  
408 mutants with colonization defects such as *nf-ya1* (Laporte *et al.*, 2014). As GLV  
409 peptides did not seem to affect infection directly but reduced nodule density, we focused  
410 on their effects on root cortical processes such as organogenesis.

411

#### 412 **GLV10 controls the zone of lateral organ formation in an RGFR receptor-** 413 **dependent manner**

414

415 Lateral root positioning (rhizotaxis) is an understudied trait while nodule positioning over  
416 the longitudinal root axis (we term nodulotaxis) has not been described in literature  
417 before. Therefore, we further investigated these two traits. In Arabidopsis, periodic  
418 pulses of auxin-induced gene expression occur over a zone of the root close to the root  
419 tip called the 'oscillation zone' which pre-patterns longitudinal spacing or LR primordia  
420 positioning and consequently determines the zone of the root that is primed or capable  
421 of initiating lateral roots (Hofhuis *et al.*, 2013; Laskowski & ten Tusscher, 2017). To  
422 better understand the effect of GLV peptides on lateral organ positioning (Traits 16-18),  
423 we pursued the peptide with the strongest and most reproducible effect, i.e., GLV10p  
424 (**Figure 4c**). In untreated seedlings, nodules typically originated at the midpoint (50%)  
425 relative to the length of the primary root. Upon GLV10p treatment, the position of the  
426 first nodule shifted to approximately 60% of the primary root length (**Figure 5 a,c**).  
427 Similarly, the relative position of the first lateral root was lower on the primary root, while  
428 that of the developmentally last formed root primordia appeared to be proximal to the  
429 root base (**Figure 5a**). This shift in organ positioning resulted in a statistically significant  
430 reduction of the absolute length of the root over which nodules formed (nod zone) and

431 the zone that supported lateral roots (LR Zone, **Figure 5 b,d**). In cases where there  
432 were only two nodules on the main root, the distance between two successive nodules  
433 was reduced. We tested the effect of GLV10p peptide effects over the 1nM to 10  $\mu$ M  
434 range on WT *M. truncatula* seedlings (**Supplemental Figure S5**) and found that effects  
435 were detectable even at a concentration of 100 nM upto 1 nM, depending on the trait  
436 under study.

437  
438 In *A. thaliana*, GLV peptides are perceived by five LRR-RLKs *ROOT GROWTH*  
439 *FACTOR1 INSENSITIVE/ROOT GROWTH FACTOR RECEPTOR*, namely  
440 AtRGI1/AtRGFR1, AtRGI2/AtRGFR2, AtRGI3/AtRGFR3, AtRGI4, and AtRGI5. The  
441 Arabidopsis *rgfr1 rgfr2 rgfr3* triple mutant has a stunted primary root and an enlarged  
442 root meristem but retains sensitivity to GLV peptide with respect to LR density  
443 (Shinohara *et al.*, 2016). We tested the effect of Medicago GLV10p on Arabidopsis root  
444 growth. GLV10p, which has three amino acids different from AtGLV10p, was perceived  
445 by Arabidopsis roots and, as in Medicago, shifted the relative position of the first lateral  
446 root to a more distal position on the primary root and decreased the zone of LR  
447 formation (**Fig 5 e,f**). However, the triple *rgfr* mutant was insensitive to GLV10p peptide  
448 with respect to LR positioning and LR zone (**Figure 5 g**), indicating that the effect of the  
449 peptide on LR zone formation was dependent on the RGI receptors.

450  
451 Finally, to test whether these effects were also mediated by GLV10 *in planta* we isolated  
452 homozygous mutants of *MtGLV10*, *glv10-1* (NF12742) and *glv10-2* (NF20983), with  
453 exonic insertions of the *Tnt1* retrotransposon (**Supplemental Figure S3**) (Tadege *et al.*,  
454 2008). The lateral root zone appeared to be wider than the WT for *glv10-1* and *glv10-2*,  
455 but varied between alleles for the Nod zone (**Figure 5 g,h**). Since there are several  
456 other GLV encoding genes involved in nodulation, higher order mutants are necessary  
457 for characterizing these traits in depth. Taken together, these data indicate that GLV  
458 peptides are negative regulators of lateral root zone formation and that this may be  
459 dependent on RGFR receptors.

460

461 **Increased primary root growth upon GLV10 application is mediated by an**  
462 **increase in cell number per cortical cell file but not cell length**

463  
464 The spatial distribution of LRs or rhizotaxis is determined by a combination of three  
465 factors - primary root growth, organ density and the distance between successive  
466 organs (Du & Scheres, 2018). Studies in Arabidopsis show that application of AtGLV6  
467 peptide to roots disrupts early symmetrical cell divisions required for correct lateral root  
468 initiation (Fernandez *et al.*, 2020). Application of the peptide GLV10 increases root  
469 length and decreases lateral root density along the primary root both, in Arabidopsis  
470 and Medicago (**Figure 4b,c**). GOLVENS therefore control at least two of the three  
471 factors responsible for spatiotemporal organ positioning. To understand the cellular  
472 basis of GLV10 mediated root elongation in Medicago we collected longitudinal sections  
473 of roots 1 cm above the root tip which revealed that both cell number and cell size were  
474 affected by application of GLV10. While cell length along the longitudinal axis  
475 decreased by more than 50%, the cell number per cortical cell file increased by 50%  
476 (**Figure 6b**); this effect persisted even in mature regions of the root (**Figure S6**).  
477 Multicellular processes such as root growth are dependent on the combined activity of  
478 two linked processes, cell expansion and cell division (Jones *et al.*, 2019). Faster root  
479 elongation rates are correlated with increased cell division at the root meristem, with  
480 little change in cellular expansion rates (Beemster & Baskin, 1998). In keeping with this  
481 observation, we propose that an increase in cortical cell number caused by GLV10  
482 plays a role in regulating root tissue growth and consequently lateral organ positioning  
483 (**Figure 6c**).

484  
485 **DISCUSSION**

486  
487 When nitrogen availability is low, plants require an internal signal(s) to inhibit LR  
488 production and promote primary root elongation in search of deeper, N-rich soil layers.  
489 *MtGLV10* and *MtGLV9* are peptide hormones induced in roots upon short term N-  
490 starvation that act as negative regulators of LR initiation and positive regulators of root  
491 elongation (**Figure 1a, Figure 4b,c**) phenocopying the N-starvation root architecture



492 response (Mohd-Radzman *et al.*, 2013). Modulation of root system architecture by  
493 GLVs in conjunction with auxin (**Figure 1b**) may have been instrumental in colonization  
494 of land by plants, allowing them to integrate nutrient stress signals into root  
495 developmental programs, given that GLVs are conserved in all land plants but not in  
496 rootless chlorophytes (**Figure 3**). Our data suggest that at least five GOLVEN peptide  
497 coding genes act in concert to control root nodule symbiosis and root architecture traits  
498 (**Figure 1, 2**). Of these five, MtGLV10 acts not only at the lateral organ initiation stage  
499 but earlier, likely during priming and organ positioning, which determines the zone of the  
500 root over which lateral organs can initiate and then emerge (**Figure 4, 5**). We apply the  
501 definition of the ‘Nodulation Zone’, as defined by Yoshida *et al.*, as the zone along the  
502 longitudinal root axis that is capable of undergoing cell division and supporting formation  
503 of nodules (Yoshida *et al.*, 2010). Similarly, the Lateral Root Zone, as interpreted in this  
504 study describes the zone along the longitudinal root axis that is capable of undergoing  
505 cell division leading to initiation of lateral roots. Like rhizotaxis, a phenomenon which  
506 ensures LR positioning and regular spacing between successive LRs, we find that a  
507 similar mechanism exists for nodule spacing, which we call nodulotaxis (**Figure 4a, b**).  
508 Although nodules can cluster together at a particular infection site, they are typically  
509 spaced out along the longitudinal root axis or the nodulation zone. Such spacing is lost,  
510 however, in the *sickle* mutant that forms a continuous chain of nodule primordia, many  
511 of which fail to develop into functional nodules (Penmetsa & Cook, 1997; Penmetsa *et*  
512 *al.*, 2003). Thus, mechanisms controlling nodule positioning and priming are important  
513 to ensure formation of fully-developed, functional nodules. At present, rhizobial  
514 infection, nodule number and N-fixation efficiency are the predominant phenotypic traits  
515 that are measured when trying to understand gene function during root nodule  
516 symbiosis. Nodulotaxis as a trait is rarely considered, if not completely overlooked, but  
517 is nevertheless important to restrict nodule numbers to levels that can be supported  
518 effectively by plant photosynthesis. Our study identifies GLV10 as a dual regulator of  
519 both rhizotaxis and nodulotaxis that controls the zone of lateral organ formation in *M.*  
520 *truncatula*. Shifting the position of the first lateral organ more distal to the root base  
521 requires deferred organ initiation in space and/or in time. From studies in *Arabidopsis*,  
522 we know that GLV peptides disrupt initial cell divisions in the root pericycle, which

523 delays or halts lateral root initiation (Fernandez *et al.*, 2015; Fernandez *et al.*, 2020). We  
524 found that in *M. truncatula*, another factor that contributes to this delay is faster root  
525 growth upon GLV application caused by an increase in cell number along the  
526 longitudinal root axis (**Figure 6b**). Both Nodules and LRs initiate acropetally, and no  
527 new organs develop between already developed lateral organs (Dubrovsky *et al.*, 2006).  
528 In theory, if treated roots are longer than those of control plants at the time of organ  
529 initiation, which only occurs in a narrow zone of the root close to the Root Apical  
530 Meristem, the first formed lateral organ will initiate more distally from the shoot  
531 compared to untreated controls. Rapid cell division stimulated by GLV10 accelerates  
532 root growth rates thereby spatially shifting the position of the first lateral organ formed  
533 (**Figure 5**). Since organ positioning is determined by a combination of three factors i.e  
534 primary root length, organ density and the distance between successive organs (Du &  
535 Scheres, 2018), further temporal delay in initiation of subsequent lateral organs would  
536 facilitate an overall decrease in the LR zone length or Nod zone length caused by  
537 altered cell division at organ initiation sites (Fernandez *et al.*, 2015). Fixed or flexible  
538 threshold theory for cell division which proposes that cells undergo division only after  
539 they have reached a certain threshold of size, would suggest that smaller cells in  
540 GLV10 treated roots may be unable to undergo asymmetric cell divisions until they have  
541 expanded sufficiently, impairing lateral organ initiation (Jones *et al.*, 2019).

542  
543 Low-N (<1 mM N) availability promotes the establishment of root nodule symbiosis,  
544 while simultaneously inducing the expression of GLVs that, ultimately, limit excessive  
545 nodulation (**Figure 1a**). Both, low N in roots and nodule development lead to GLV  
546 production in these organs similar to known Autoregulation of Nodulation pathway  
547 where CLE-SUNN signaling ensures sufficient but not excessive nodulation (Okamoto  
548 *et al.*, 2013; Nishida *et al.*, 2018). MtNIN directly induces the expression of *MtCLE13*,  
549 and mobile *MtCLE13* is recognized by *MtSUNN* in the shoot, which mediates systemic  
550 AON that limits further nodulation (Laffont *et al.*, 2020). Our data indicate that in addition  
551 to controlling the CLE (and CEP) nodulation regulators (Laffont *et al.*, 2020), NIN is  
552 required for *MtGLV9* and *MtGLV10* expression at nodule initiation sites (**Figure 1c**).  
553 Identification of GLV receptor(s) will enable investigations into possible crosstalk with

554 the CLE-SUNN module that regulates nodule number through long distance signaling,  
555 or other root components such as SKL that control nodule number and positioning  
556 locally. Given that the *A. thaliana rgfr* triple mutant is insensitive to high doses of GLV10  
557 peptide, which normally reduces the LR zone and alters LR positioning (**Figure 5 e,f**),  
558 the corresponding receptor orthologues in *M. truncatula* are interesting candidates for  
559 further investigations.

560

561 A question that remains unanswered is whether the nodulation zone is identical to the  
562 rhizobial infection susceptible zone given that nodule organogenesis and rhizobial  
563 infection are genetically separable processes. The finding that GLV10 application  
564 reduces nodule density over the total root length without changing infection thread  
565 density (**Figure S2**), combined with the observation that none of the five GLVs are  
566 expressed *in vivo* within infected root hairs (**Figure 2, Figure S2**) suggests that GLV10  
567 controls cortical processes that regulate organogenesis rather than infection.

568 Nevertheless, since the zone of infection competent root hair cells is narrower  
569 compared to the total root length supporting root hairs, further studies are required to  
570 understand GLV control of rhizobial infection including changes in root hair length, root  
571 hair density and length of the susceptibility zone upon GLV10 application.

572

573 In conclusion, our study introduces a new set of players, namely the GOLVEN signaling  
574 peptides, into the story of root nodule symbiosis. Our work reinforces chemical  
575 genomics as a powerful approach to understanding peptide function in plant  
576 development, such as nodulotaxis. Similar synthetic tools continue to be instrumental in  
577 understanding function of classical phytohormones in hormone research. Although, a lot  
578 remains to be discovered, our work presented here sets the stage for future work on this  
579 interesting new family of nodulation regulators.

580

## 581 **ACKNOWLEDGEMENTS**

582

583 Authors gratefully acknowledge the help of Lynne Jacobs in the greenhouse, Lloyd  
584 Noble summer scholar Miss Sarah Dysinger for data entry and assistance with plant

585 growth. We thank Dr. Julia Frugoli for the gift of the *sun*n mutant seeds and Dr.  
586 Yoshikatsu Matsubayashi for the gift of *rgfr1,2,3* mutant seeds. This research was  
587 funded by of NSF#1444549 and the Noble Research Institute.

588

#### 589 **AUTHOR CONTRIBUTIONS**

590 S.R, I.T.J, S.Z, W.L, K.S, H.K.L, C.B performed experiments and helped acquire data,  
591 S.R analyzed data, S.R, W.R.S, M.U conceptualized this study, P.X.Z, G.E.D.O, J.D.M,  
592 W.R.S, M.U supervised the research, S.R, M.U wrote the manuscript.

593

#### 594 **DATA AVAILABILITY**

595 All peptide gene overexpression constructs have been deposited with Addgene and can  
596 be accessed under deposit ID 79021.

597

598

599 **FIGURE LEGENDS**

600

601 **Figure 1.** Expression of GOLVEN/ROOT GROWTH FACTOR peptide-coding genes is  
602 induced during nitrogen deficiency, auxin treatments and root nodule symbiosis. (a) Bar  
603 charts showing quantitative-PCR estimation of transcript abundance after 48 hours of  
604 nitrogen deprivation and at different time points (days post inoculation) during nodule  
605 development compared to uninfected roots (0 dpi). Error bars depict standard error of  
606 mean. (b) Bar charts showing quantitative-PCR estimation of transcript abundance in *M.*  
607 *truncatula* seedling roots treated with 1  $\mu$ M auxin (3-IAA) or the solvent control (DMSO).  
608 Data are representative of three biological replicates with 40-60 seedling roots per  
609 replicate. Error bars depict standard error of mean. (c) Bar charts showing quantitative-  
610 PCR estimation of MtGLV9 and MtGLV10 transcript abundance in spot inoculated  
611 nodules on *M. truncatula* WT and *nin* mutants. Data are representative of three  
612 biological replicates each with at least 50-60 spot inoculated nodules.

613

614 **Figure 2.** Five GOLVEN/ROOT GROWTH FACTOR peptide-coding genes are  
615 expressed during nodule organogenesis and root growth. (a) Promoter-GUS reporter  
616 fusions showing spatial expression of nodule induced *GLV* peptide-coding genes in  
617 nodule primordia, mature nodules, lateral roots and root tips. Arrowheads indicate  
618 infection threads. Scale bars denote 100  $\mu$ M except for mature nodules (28 DPI) which  
619 measure 500  $\mu$ M. At least 4-6 independent hairy root lines were assessed at every time  
620 point. (b) Overexpression of all five *GLV* coding genes in hairy roots of *M. truncatula*  
621 suppresses the formation of nodules. Each individual dot or triangle in the box plot  
622 indicates an independent line. Average nodule number of indicates on the shoulder of  
623 each box plot. One way ANOVA followed by Dunnett's multiple comparison test was  
624 performed separately for experiment 1 and experiment 2 with their respective controls  
625 where \* $p$ <0.05, \*\* $p$ <0.01, \*\*\* $p$ <0.001. Data displayed summarize two independent  
626 experiments per construct. Average values are provided on the shoulder of each box  
627 plot.

628

629 **Figure 3.** GOLVEN like peptides are encoded in all plants that form roots or root-like  
630 structures.

631 Maximum likelihood phylogenetic tree created with the full length GOLVEN encoding  
632 polypeptide using MEGA X with 1000 bootstraps each. Please refer to Supplementary  
633 Table 1 for gene IDs and corresponding peptide sequence.

634

635 **Figure 4.** GLV peptides affect root architecture and nodule formation.

636 (a) Representative images showing *M. truncatula* Jemalong A17 seedlings 10 days post  
637 germination (dpg) on plates containing 1  $\mu$ M of the indicated peptide in B&D medium  
638 with 0.5 mM KNO<sub>3</sub>. The predicted bioactive peptides (GLVp) were around 13 amino  
639 acid residues long except for GLV2p (Supplementary Figure 2). Peptides were  
640 synthesized with a sulfotyrosine residue at position two and a hydroxyproline at position  
641 ten. In case of MtGLV6 where there was more than one proline, we designed alternate  
642 versions with a hydroxyproline in either position 9 (GLV10\_hyp9) or 10 (GLV10\_hyp10).  
643 A synthetic version of MtGLV13 derived peptide, which was not regulated during  
644 nodulation, was included. As negative controls we generated a non-modified (non-  
645 sulfated, non-hydroxylated) version of the most potent peptide GLV10p (nmGLV10) and  
646 a hydroxylated non-sulfated version (nsGLV10). We generated a ‘scrambled’ version of  
647 MtGLV10 (scrGLV10) with identical amino acid composition but a randomized order of  
648 amino acids with or without the secondary group modifications (Refer to Extended Data  
649 Fig. 2 for corresponding peptide sequences). (b) Corresponding rain plot showing  
650 cumulative growth data of seedlings 10 dpi with *Sinorhizobium meliloti* Rm 2011  
651 dsRED. Colors represent normalized average values with red representing increased  
652 trait values and blue representing decreased trait values. Data were compared using a  
653 Student’s t-test and bubble size indicates  $-\log(p\text{-value})$ . Refer to Supplementary Table 1  
654 for trait definitions. (c) Boxplots of four individual traits of interest showing effect of GLV  
655 peptides compared to negative controls; Trait 9 (Total LR density), Trait 12 (Total  
656 nodule number), Trait 16 (Relative position of first formed nodule), Trait 18 (Nodule  
657 formation zone). Asterisks represent \* $p < 0.05$ , \*\* $p < 0.01$ , \*\*\* $p < 0.001$  using a Brown-  
658 Forsythe and Welch ANOVA protected Dunnett’s multiple comparison test (treatment vs  
659 no-peptide control).

660

661 **Figure 5.** Peptide GOLVEN10 shifts the position of lateral organs consequently  
662 reducing the longitudinal zone of organ formation. Position of the developmentally first  
663 and last formed organ relative to the primary root length measured from the root tip with  
664 and without GLV10p treatment and the resulting zone of organ formation on *M.*  
665 *truncatula* Jemalong A17 seedlings 14 dpi with Sm2011 dsRED and 17 days post  
666 germination. (a) Nodule position (b) Nodule formation zone (c) Lateral root position (d)  
667 LR formation zone. Asterisks represent \* $p < 0.05$ , \*\* $p < 0.01$ , \*\*\* $p < 0.001$  using a Student's  
668 t-test. (e,f) Position of the developmentally first and last formed organ measured from  
669 the root tip, relative to the primary root length with and without 10  $\mu\text{M}$  GLV10 peptide  
670 treatment and the resulting zone of organ formation on *A. thaliana* WT Col-0 and  
671 *rgfr1,2,3* mutant lines 14 days post germination. Asterisks represent \* $p < 0.05$ , \*\* $p < 0.01$ ,  
672 \*\*\* $p < 0.001$  using ANOVA-protected Tukey's multiple comparison test. (g,h) Size of the  
673 Nod Zone and LR Zone in WT R108 compared to single *glv10* mutants two wpi with  
674 Rm2011. Data are representative of cumulative values from two identical experiments.  
675 Asterisks represent \* $p < 0.05$ , \*\* $p < 0.01$ , \*\*\* $p < 0.001$  using ANOVA-protected Dunnett's  
676 multiple comparison test. Numeric values for the absolute zone of lateral organ  
677 formation are provided on the shoulder of box plots.

678

679 **Figure 6.** The synthetic peptide GLV10 affects cell number and cell size in Medicago  
680 roots.

681 (a) Images show 2.5  $\mu\text{m}$  thick sections of root segments collected one cm below root tip  
682 at a 20x magnification. Control roots treated with solvent (left) and roots treated with 1  
683  $\mu\text{M}$  GLV10 peptide (right) for seven days. Scale bars represent 50  $\mu\text{m}$ . Segments from  
684 at least eight roots per sample were analyzed. (b) Quantification of data shown in (a)  
685 using ImageJ. Application of GLV10 peptide increases root length by increasing cell  
686 number but decreasing cell size in each cortical cell file. Roots were treated with peptide  
687 for seven days on plates and compared to untreated roots. Student's t-test \*\*\* $p < 0.001$ .  
688 (c) Diagrammatic representation of nodulotaxy as mediated by the peptide GLV10.  
689

690 **Figure S1.** Expression of GLVs during nodulation, N-deprivation and in infected root  
691 hairs.

692 Expression of GOLVEN peptide encoding genes in *Medicago*. (a) Quantitative PCR  
693 estimation of GLV transcript abundance at the denoted timepoints. \* $p < 0.05$ , \*\*\* $p < 0.001$   
694 based on an ANOVA-protected Dunnett's multiple comparison test (vs 0 dpi uninfected  
695 roots). Error bars indicate SEM and three biological replicates per time point were used.  
696 (b) qPCR estimation of GLV transcript abundance in *M. truncatula* A17 plants deprived  
697 of N for two weeks compared to plants supplemented with potassium nitrate as in de  
698 Bang et al., 20178. Student's t-test \* $p < 0.05$ . Error bars indicate SEM and three  
699 biological replicates per treatment were used. (c) GLV promoter-GUS reporter activity is  
700 absent in infection threads of *M. truncatula* hairy roots transformed with the indicated  
701 constructs four dpi with Rm1021. Rhizobia are co-stained in magenta-gal. Scale bars  
702 represent 100  $\mu\text{m}$ .

703

704 **Figure S2.** Sequence and physiological effects of synthetic GLV peptides used in this  
705 study.

706 (a) Logo showing conserved residues in *Medicago* peptides. (b) Sequence of GLV  
707 peptides synthesized in this study. (c) *M. truncatula* root images showing stages of  
708 lateral root or nodules scored in this study. Scale bars denote 500  $\mu\text{m}$ . See  
709 Supplementary Table 1 for trait definitions. (d) Time plots over 60 hours showing effects  
710 of synthetic peptides used in this study on growth of Rm2011 dsRED in the presence of  
711 the peptides as indicated. Asterisk \* indicates a significant difference for GLV6\_hyp10  
712 which was not reproducible in subsequent experiments. (e) Change in total root length  
713 in *M. truncatula* Jemalong A17 seedling roots upon peptide treatment compared to  
714 control (no peptide). Asterisks represent \* $p < 0.05$  using a posthoc Dunnett's multiple  
715 comparison test following a one-way ANOVA. (f) Change in total rhizobial infections  
716 upon peptide treatment compared to control in the same experiment. Asterisks  
717 represent \*\* $p < 0.01$ , \*\*\* $p < 0.001$  using a posthoc Dunnett's multiple comparison test  
718 following a one-way ANOVA. (g) Number of infection events per cm total root in the  
719 same experiment as (e,f) above. Asterisks represent \*\* $p < 0.01$ , \*\*\* $p < 0.001$  using a  
720 ANOVA-protected Dunnett's multiple comparison test. (h) Images showing infection



721 structures in *M. truncatula* seedlings infected with Rm2011 HemA::LacZ seven days  
722 post inoculation. Scale bars represent 100  $\mu$ m.

723

724 **Figure S3.** Characterization of lines used in this study.

725 Expression of individual MtGLV genes in their corresponding over expression lines. (a)  
726 *MtGLV1* (b) *MtGLV2* (c) *MtGLV6* (d) *MtGLV9* (e) *MtGLV10*. Data represent qPCR  
727 estimation of transcript abundance using hairy root tissues. Error bars indicated SEM,  
728  $n=2-4$  per line. Student's t-test \* $p<0.05$ , \*\*\* $p<0.001$ . (f) Gene structure showing position  
729 of *Tnt1* insertions in exonic regions of *glv10* mutant lines used in this study. (g) Agarose  
730 gel images showing PCR amplicons in WT R108 compared to mutants.

731

732 **Figure S4.** Effect of GLV10 peptide application on *M. truncatula* root growth.

733 (a) Overview of peptide treatment and plant growth setup used in this study. (b, c)  
734 Representative images comparing effects of GLV10 peptide application to roots at 1  $\mu$ M  
735 concentration compared to untreated roots. Images were taken 10 days post transfer to  
736 plates containing 1% Agarose in water.

737

738 **Figure S5.** Peptide dilution curve.

739 (a) Representative root scans showing seedling morphology 13 days post growth on B  
740 & D low-N media containing GLV10p, a modified non-sulfated version of the same  
741 peptide (nsGLV10p) and a scrambled version of the peptide (scrGLV10p) at the  
742 concentrations indicated. See Supplementary Figure S3 for sequence details. (b)  
743 Number of nodules, position of developmentally first formed nodule relative to primary  
744 root length and the resulting nodule formation zone 10 days post inoculation with *S.*  
745 *meliloti* strain Rm2011 dsRed at the concentrations of peptides indicated. (c) Density of  
746 lateral roots formed, position of developmentally first formed lateral root relative to  
747 primary root length and the resulting LR formation zone in the same experiment.

748

749 **Figure S6.** The synthetic peptide GLV10 affects cell number and cell size in Medicago  
750 roots.

751 Images show 2.5  $\mu\text{m}$  thick sections of root segments collected four cm below root tip at  
752 a 20x magnification. Control roots treated with solvent (a) and roots treated with 1  $\mu\text{M}$   
753 GLV10 peptide (b) for seven days. Scale bars represent 50  $\mu\text{m}$ . Segments from at least  
754 eight roots per sample were analyzed. Quantification of data shown in (a,b) using  
755 ImageJ. Application of GLV10 peptide increases root length by increasing cell number  
756 (c) but decreasing cell size (d) in each cortical cell file. Roots were treated with peptide  
757 for seven days on plates and compared to untreated roots. Student's t-test \*\*\* $p < 0.001$ .

758 **FIGURES**

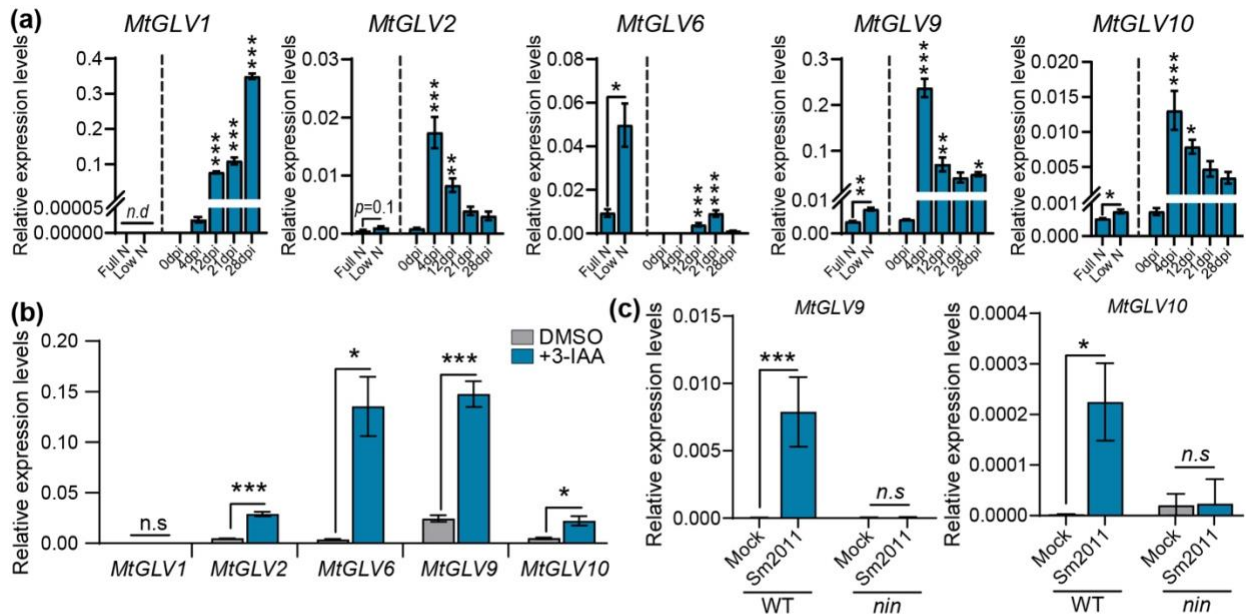

**Figure 1.** Expression of GOLVEN/ROOT GROWTH FACTOR peptide-coding genes is induced during Nitrogen deficiency, auxin treatments and root nodule symbiosis. **(a)** Bar charts showing quantitative-PCR estimation of transcript abundance after 48 hours of nitrogen deprivation and at different time points (days post inoculation) during nodule development compared to uninfected roots (0 dpi). Error bars depict standard error of mean. **(b)** Bar charts showing quantitative-PCR estimation of transcript abundance in *M. truncatula* seedling roots treated with 1  $\mu$ M auxin (3-IAA) or the solvent control (DMSO). Data are representative of three biological replicates with 40-60 seedling roots per replicate. Error bars depict standard error of mean. **(c)** Bar charts showing quantitative-PCR estimation of *MtGLV9* and *MtGLV10* transcript abundance in spot inoculated nodules on *M. truncatula* WT and *nin* mutants. Data are representative of three biological replicates each with at least 50-60 spot inoculated nodules.

759

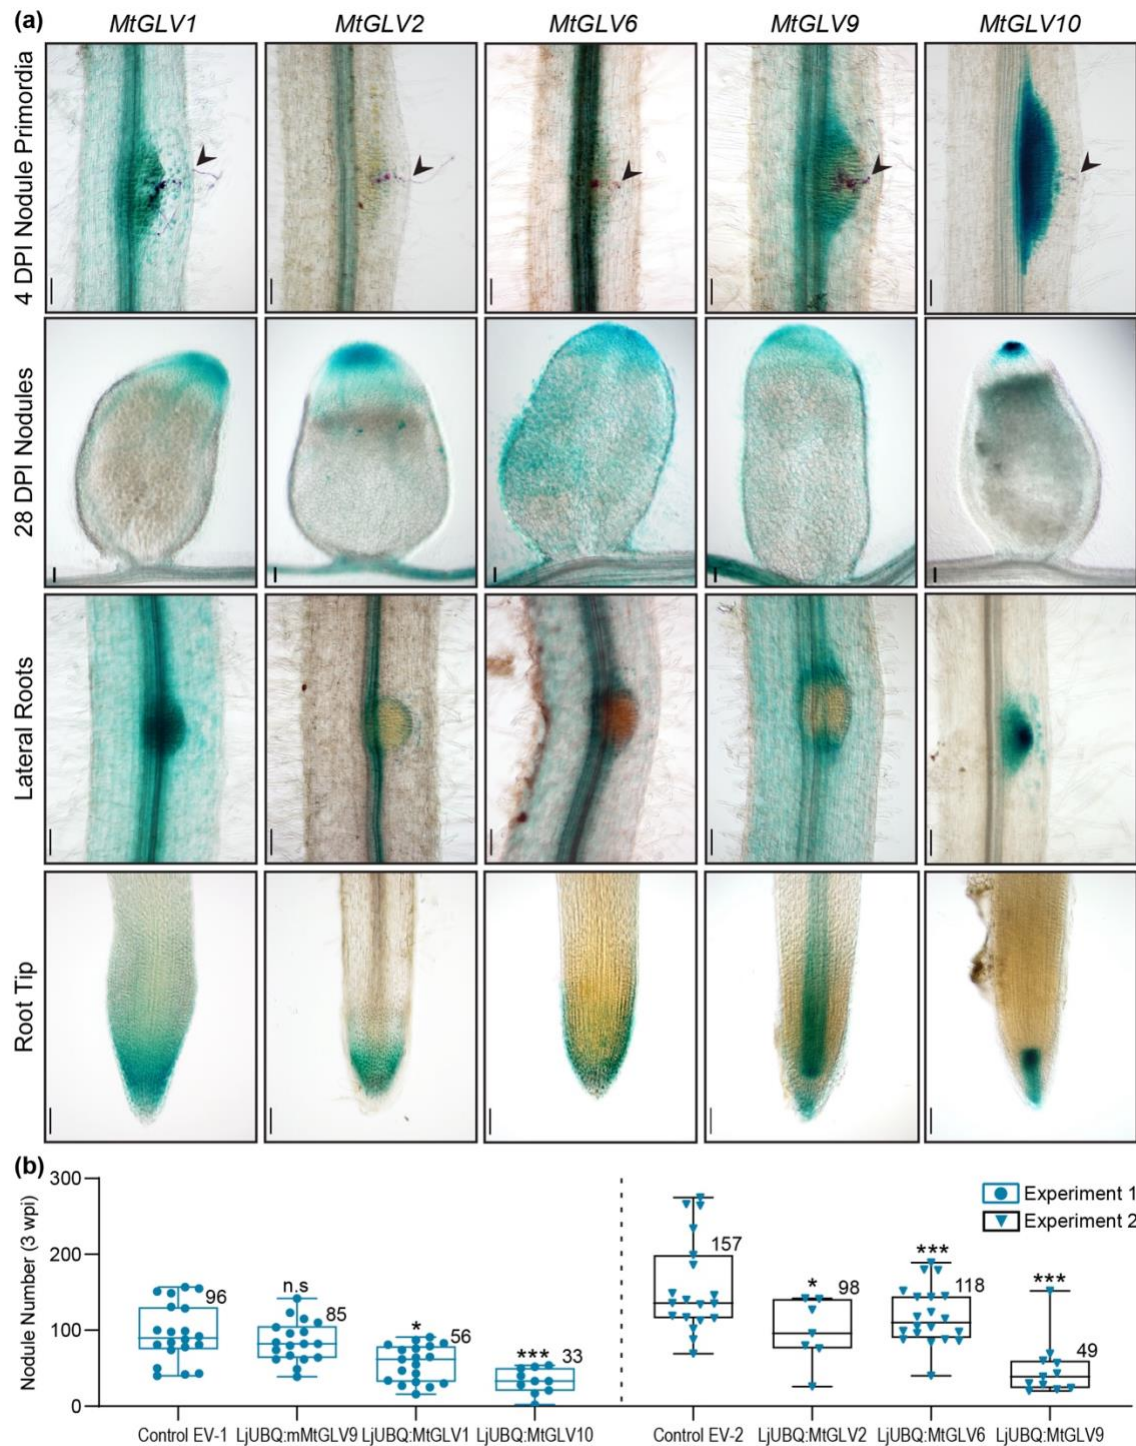

**Figure 2.** Five GOLVEN/ROOT GROWTH FACTOR peptide-coding genes are expressed during nodule organogenesis and root growth. **(a)** Promoter-GUS reporter fusions showing spatial expression of nodule induced GLV peptide-coding genes in nodule primordia, mature nodules, lateral roots and root tips. Arrowheads indicate infection threads. Scale bars denote 100  $\mu$ M except for mature nodules (28 DPI) which measure 500  $\mu$ M. At least 4-6 independent hairy root lines were assessed at every time point. **(b)** Overexpression of all five GLV coding genes in hairy roots of *M. truncatula* suppresses the formation of nodules. Each individual dot or triangle in the box plot indicates an independent line. Average nodule number of indicates on the shoulder of each box plot. One way ANOVA followed by Dunnett's multiple comparison test was performed separately for experiment 1 and experiment 2 with their respective controls where \* $p$ <0.05, \*\* $p$ <0.01, \*\*\* $p$ <0.001. Data displayed summarize two independent experiments per construct. Average values are provided on the shoulder of each box plot.

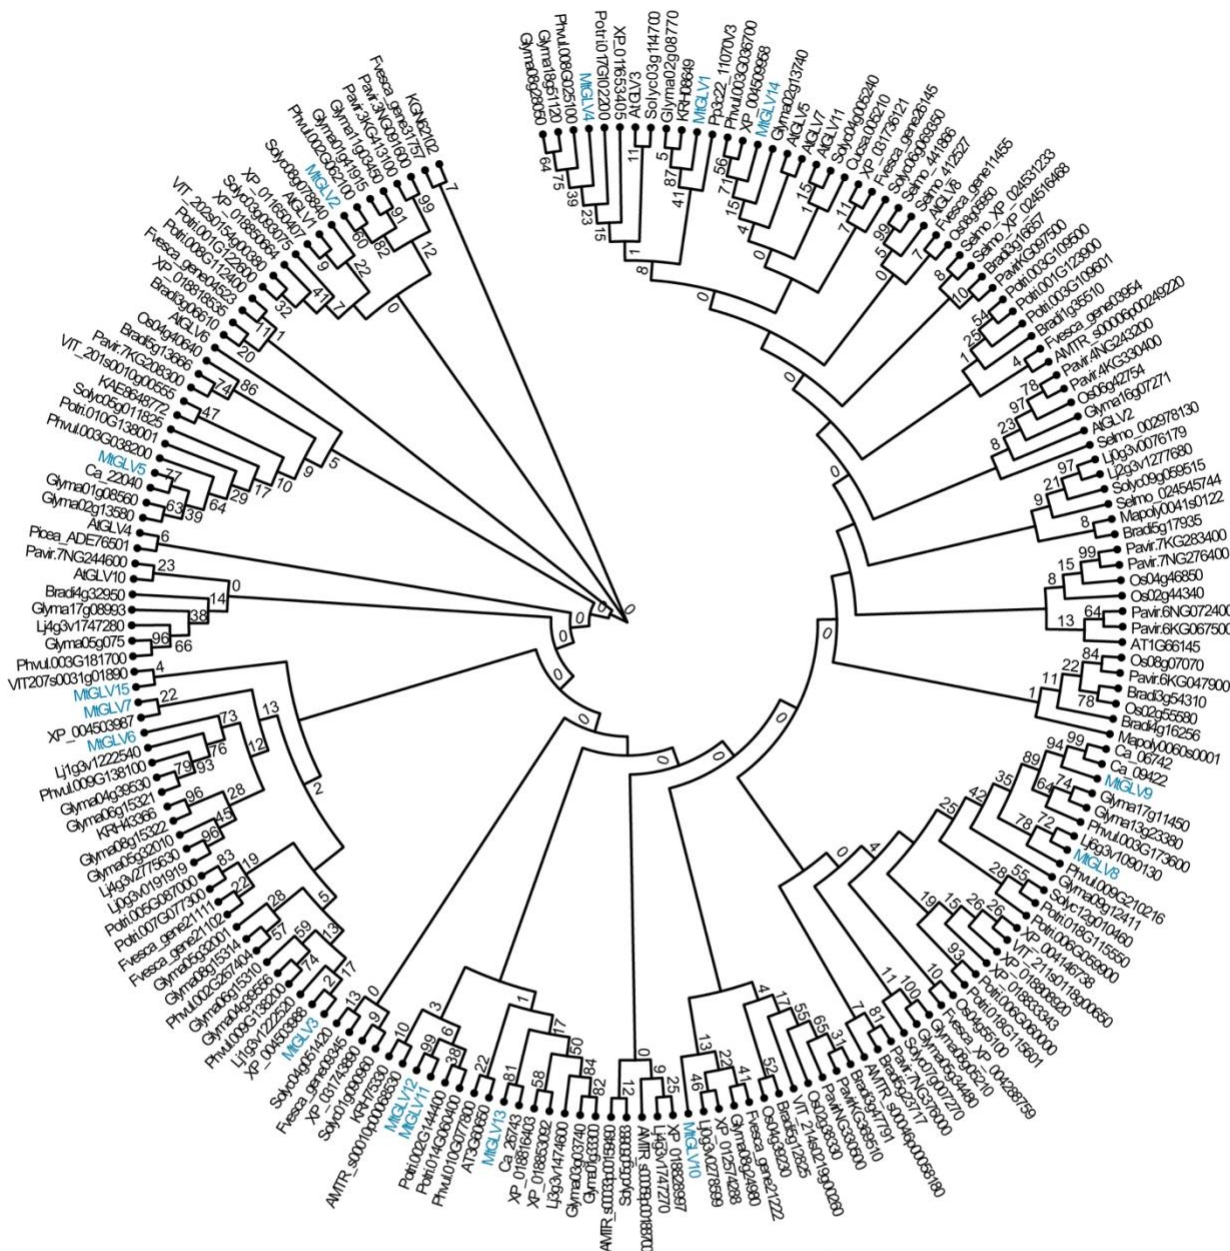

| Species                           | Number of homologs |
|-----------------------------------|--------------------|
| <b>Chlorophyte</b>                |                    |
| <i>Chlamydomonas reinhardtii</i>  | 0                  |
| <b>Bryophyte</b>                  |                    |
| <i>Physcomitrella patens</i>      | 1                  |
| <b>Bryophyte</b>                  |                    |
| <i>Marcantia polymorpha</i>       | 2                  |
| <b>Lycophyte</b>                  |                    |
| <i>Selaginella moellendorffii</i> | 6                  |
| <b>Gymnosperm</b>                 |                    |
| <i>Picea sitchensis</i>           | 1                  |
| <b>Angiosperm (basal)</b>         |                    |
| <i>Amborella trichopoda</i>       | 5                  |
| <b>Monocots</b>                   |                    |
| <i>Brachypodium distachyon</i>    | 11                 |
| <b>Monocots</b>                   |                    |
| <i>Oryza sativa</i>               | 10                 |
| <b>Monocots</b>                   |                    |
| <i>Panicum virgatum</i>           | 14                 |
| Species                           | Number of homologs |
| <b>Asteroids - Solanales</b>      |                    |
| <i>Solanum lycopersicum</i>       | 12                 |
| <b>Rosids - Vitales</b>           |                    |
| <i>Vitis vinifera</i>             | 5                  |
| <b>Eurosids - Brassicales</b>     |                    |
| <i>Arabidopsis thaliana</i>       | 12                 |
| <b>Eurosids - Malpighiales</b>    |                    |
| <i>Populus trichocarpa</i>        | 15                 |
| <b>Eurosids - Fabales</b>         |                    |
| <i>Cicer arietinum</i>            | 8                  |
| <b>Eurosids - Fabales</b>         |                    |
| <i>Glycine max</i>                | 30                 |
| <b>Eurosids - Fabales</b>         |                    |
| <i>Lotus japonicus</i>            | 11                 |
| <b>Eurosids - Fabales</b>         |                    |
| <i>Medicago truncatula</i>        | 15                 |
| <b>Eurosids - Fabales</b>         |                    |
| <i>Phaseolus vulgaris</i>         | 11                 |
| <b>Eurosids - Fagales</b>         |                    |
| <i>Juglans regia</i>              | 7                  |
| <b>Eurosids - Cucurbitales</b>    |                    |
| <i>Cucumis sativus</i>            | 8                  |
| <b>Eurosids - Rosales</b>         |                    |
| <i>Fragaria vesca</i>             | 10                 |

**Figure 3.** GOLVEN like peptides are encoded in all plants that form roots or root-like structures. Maximum likelihood phylogenetic tree created with the full length GOLVEN encoding polypeptide using MEGA X with 1000 boot straps each. Please refer to Supplementary Table 1 for gene IDs and corresponding peptide sequence.

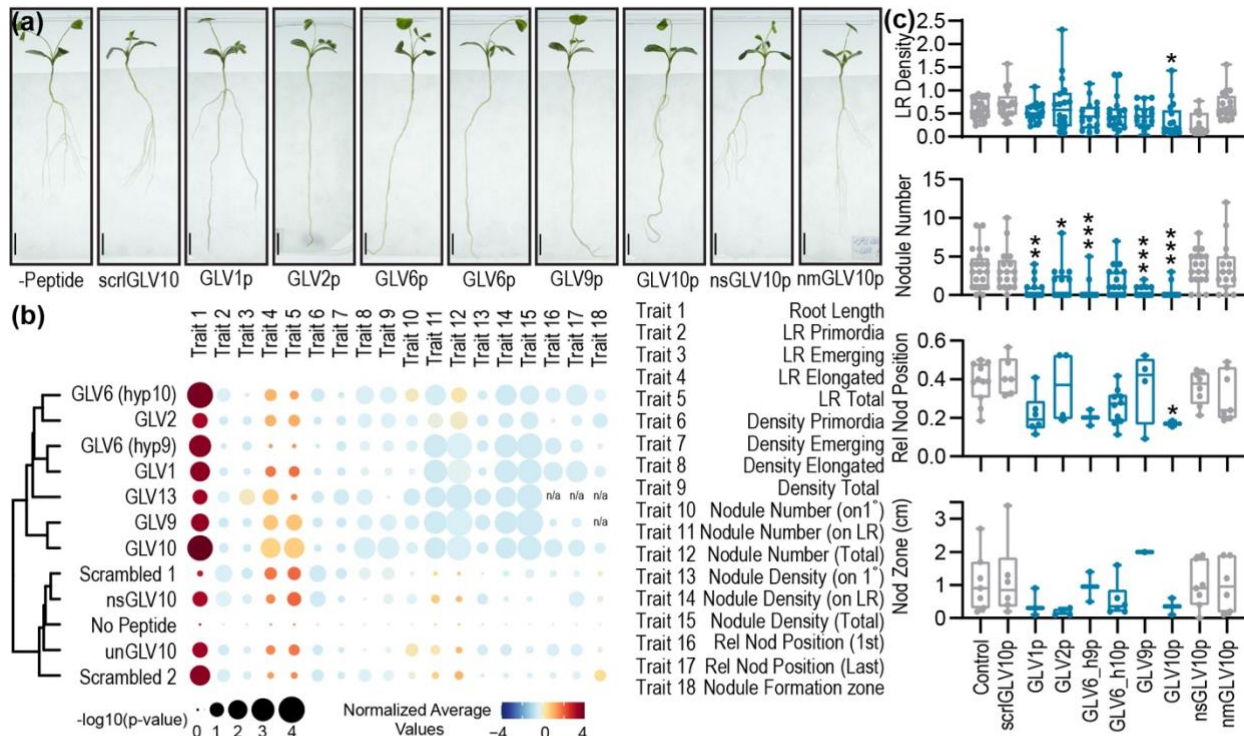

762

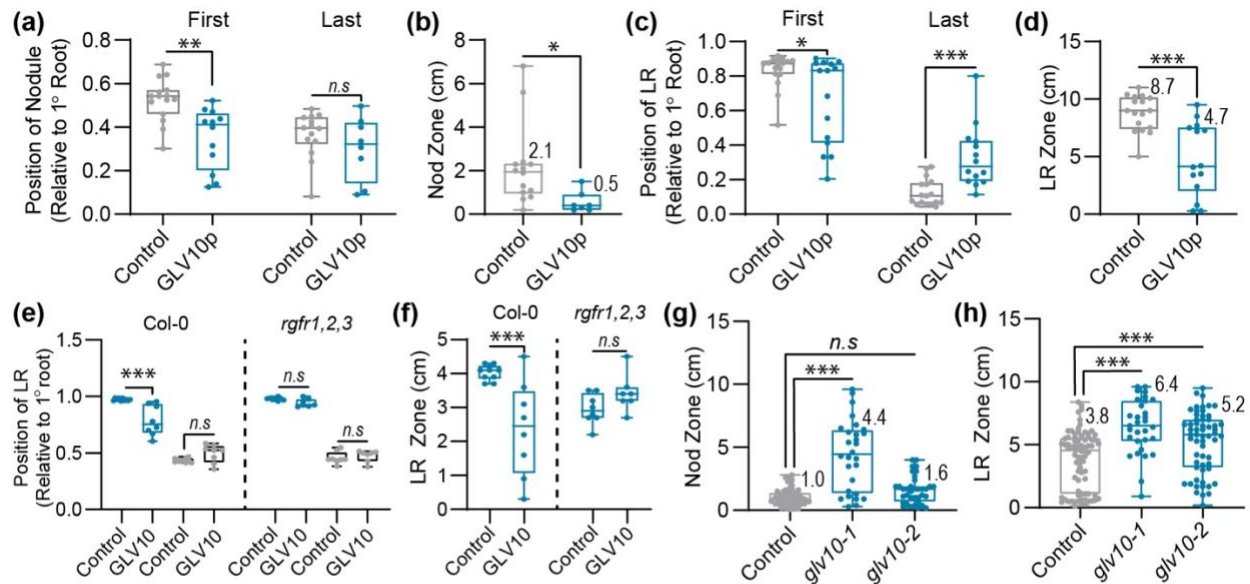

**Figure 5. Peptide GOLVEN10 shifts the position of lateral organs consequently reducing the longitudinal zone of organ formation.** Position of the developmentally first and last formed organ relative to the primary root length measured from the root tip with and without GLV10p treatment and the resulting zone of organ formation on *M. truncatula* Jemalong A17 seedlings 14 dpi with Sm2011 dsRED and 17 days post germination. (a) Nodule position (b) Nodule formation zone (c) Lateral root position (d) LR formation zone. Asterisks represent \* $p < 0.05$ , \*\* $p < 0.01$ , \*\*\* $p < 0.001$  using a Student's t-test. (e,f) Position of the developmentally first and last formed organ measured from the root tip, relative to the primary root length with and without 10  $\mu$ M GLV10 peptide treatment and the resulting zone of organ formation on *A. thaliana* WT Col-0 and *rgfr1,2,3* mutant lines 14 days post germination. Asterisks represent \* $p < 0.05$ , \*\* $p < 0.01$ , \*\*\* $p < 0.001$  using ANOVA-protected Sidak's multiple comparison test. (g,h) Size of the Nod Zone and LR Zone in WT R108 compared to single *glv9* and *glv10* mutants two wpi with Rm2011. Data are representative of cumulative values from two identical experiments. Asterisks represent \* $p < 0.05$ , \*\* $p < 0.01$ , \*\*\* $p < 0.001$  using ANOVA-protected Dunnett's multiple comparison test. Numeric values for the absolute zone of lateral organ formation are provided on the shoulder of box plots.

763

764

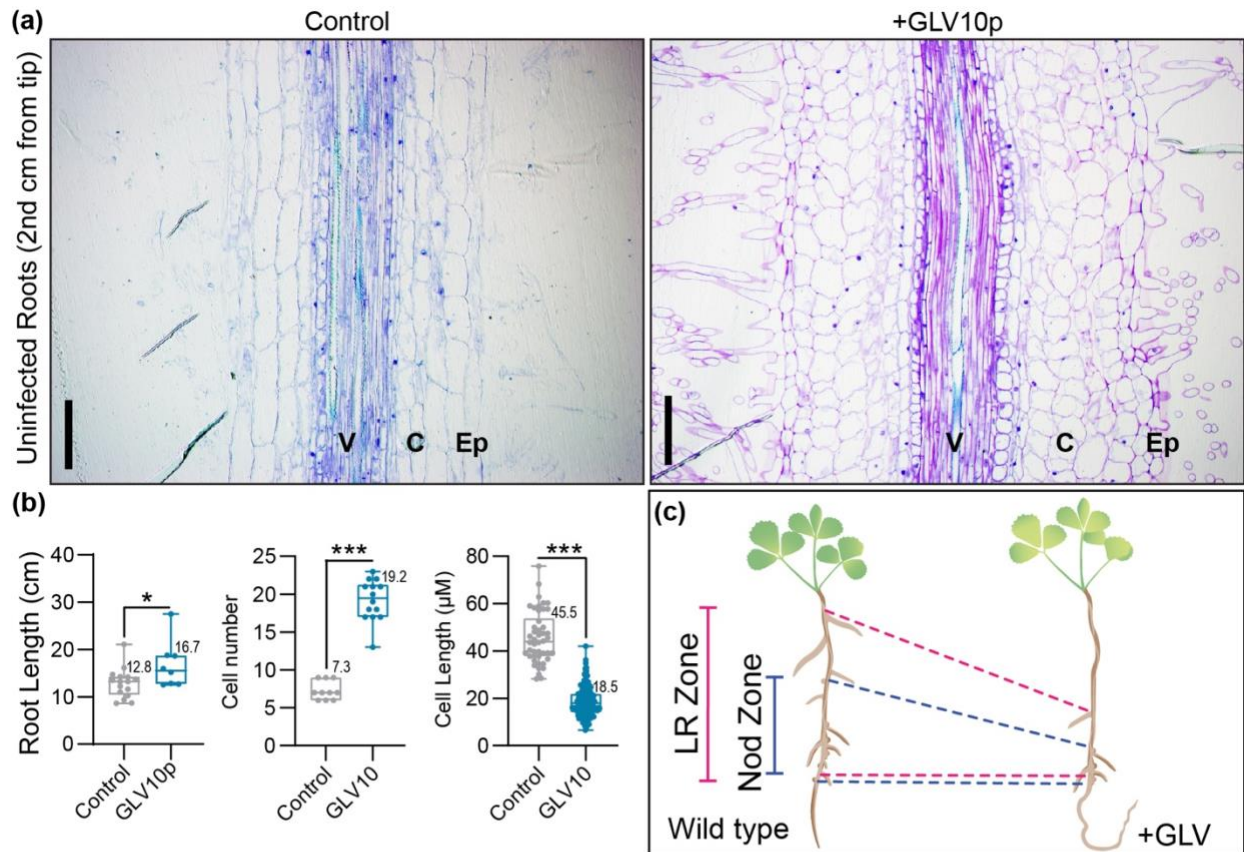

**Figure 6. The synthetic peptide GLV10 affects cell number and cell size in Medicago roots.**

(a) Images show 2.5 μm thick sections of root segments collected one cm below root tip at a 20x magnification. Control roots treated with solvent (left) and roots treated with 1 μM GLV10 peptide (right) for seven days. Scale bars represent 50 μm. Segments from at least eight roots per sample were analyzed. V: Vasculature, C: Cortex, Ep: Epidermis (b) Quantification of data shown in (a) using ImageJ. Application of GLV10 peptide increases root length by increasing cell number but decreasing cell size in each cortical cell file. Roots were treated with peptide for seven days on plates and compared to untreated roots. Student's t-test \* $p < 0.05$  \*\*\* $p < 0.001$ . (c) Diagrammatic representation of nodulotaxy as mediated by the peptide GLV10.

765



766 **SUPPLEMENTAL INFORMATION**

767

768 **Supplemental Table S1:** List of orthologous GOLVEN peptide coding genes found  
769 across 21 plant species.

770 **Supplemental Table S2:** Root architecture and nodulation described in this study.

771 **Supplemental Table S3:** List of Primers, constructs, and lines used in this study.

772

773 **SUPPLEMENTAL FIGURES**

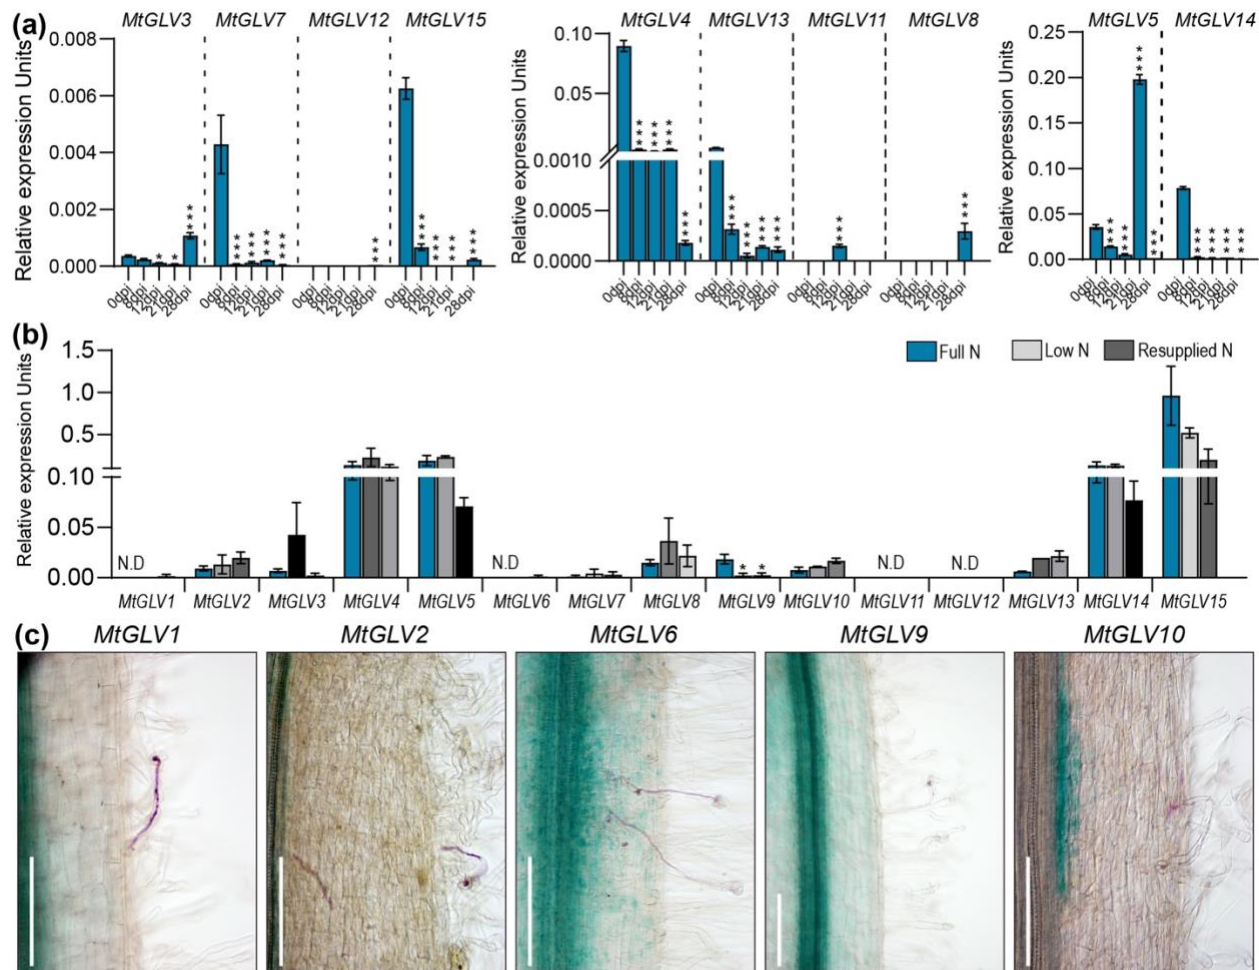

**Figure S1. Expression of GLVs during nodulation, N-deprivation and in infected root hairs.** Expression of GOLVEN peptide encoding genes in *Medicago*. **(a)** Quantitative PCR estimation of GLV transcript abundance at the denoted timepoints. \* $p < 0.05$ , \*\*\* $p < 0.001$  based on an ANOVA-protected Dunnett's multiple comparison test (vs 0 dpi uninfected roots). Error bars indicate SEM and three biological replicates per time point were used. **(b)** qPCR estimation of GLV transcript abundance in *M. truncatula* A17 plants deprived of N for two weeks compared to plants supplemented with potassium nitrate as in de Bang et al., 20178. Student's t-test \* $p < 0.05$ . Error bars indicate SEM and three biological replicates per treatment were used. **(c)** GLV promoter-GUS reporter activity is absent in infection threads of *M. truncatula* hairy roots transformed with the indicated constructs four dpi with Rm1021. Rhizobia are co-stained in magenta-gal. Scale bars represent 100  $\mu\text{m}$ .

774

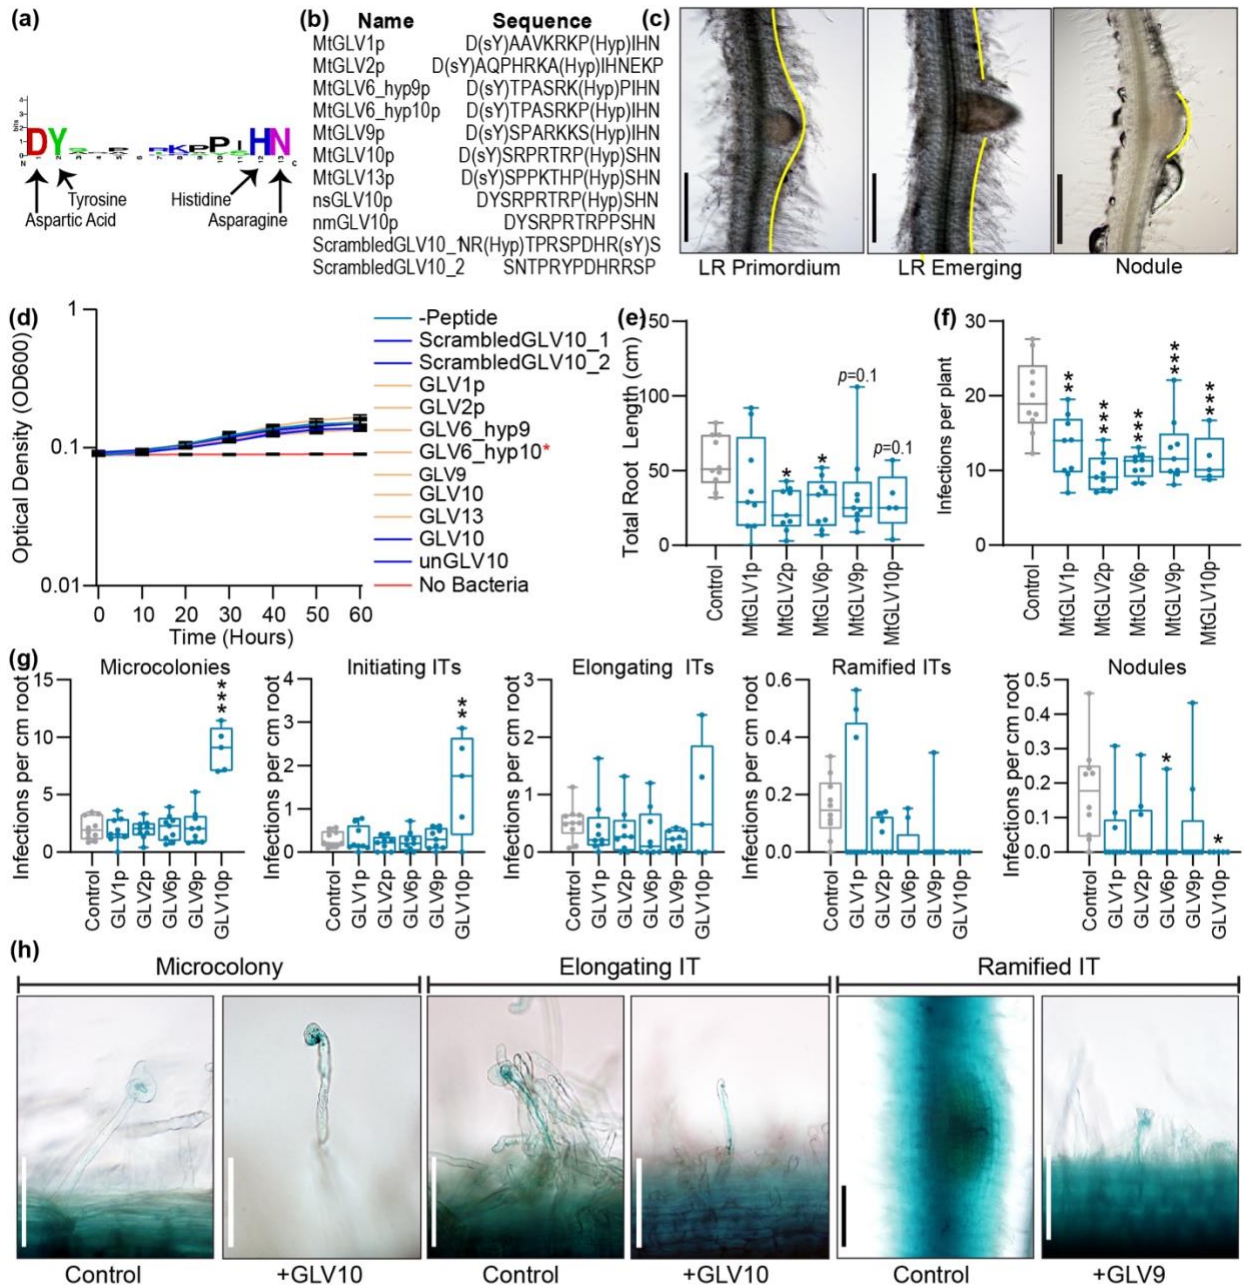

**Figure S2.** Sequence and physiological effects of synthetic GLV peptides used in this study.

(a) Logo showing conserved residues in *Medicago* peptides. (b) Sequence of GLV peptides synthesized in this study. (c) *M. truncatula* root images showing stages of lateral root or nodules scored in this study. Scale bars denote 500  $\mu\text{m}$ . See Supplementary Table 1 for trait definitions. (d) Time plots over 60 hours showing effects of synthetic peptides used in this study on growth of Rm2011 dsRED in the presence of the peptides as indicated. Asterisk \* indicates a significant difference for GLV6\_hyp10 which was not reproducible in subsequent experiments. (e) Change in total root length in *M. truncatula* Jemalong A17 seedling roots upon peptide treatment compared to control (no peptide). Asterisks represent  $*p < 0.05$  using a posthoc Dunnett's multiple comparison test following a one-way ANOVA. (f) Change in total rhizobial infections upon peptide treatment compared to control in the same experiment. Asterisks represent  $**p < 0.01$ ,  $***p < 0.001$  using a posthoc Dunnett's multiple comparison test following a one-way ANOVA. (g) Number of infection events per cm total root in the same experiment as (e,f) above. Asterisks represent  $**p < 0.01$ ,  $***p < 0.001$  using a ANOVA-protected Dunnett's multiple comparison test. (h) Images showing infection structures in *M. truncatula* seedlings infected with Rm2011 Hema::LacZ seven days post inoculation. Scale bars represent 100  $\mu\text{m}$ .

776

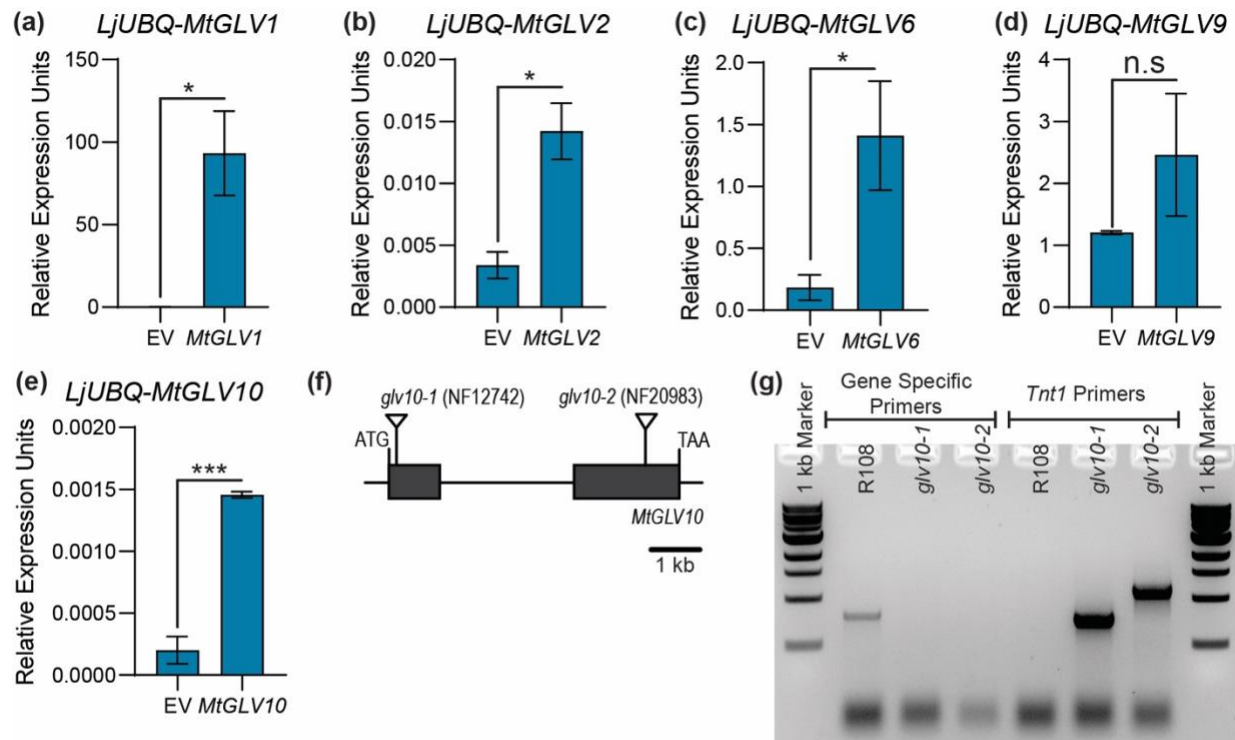

**Figure S3. Characterization of lines used in this study.**

Expression of individual *MtGLV* genes in their corresponding over expression lines. (a) *MtGLV1* (b) *MtGLV2* (c) *MtGLV6* (d) *MtGLV9* (e) *MtGLV10*. Data represent qPCR estimation of transcript abundance using hairy root tissues. Error bars indicated SEM, n=2-4 per line. Student's t-test \* $p < 0.05$ , \*\*\* $p < 0.001$ . (f) Gene structure showing position of *Tnt1* insertions in exonic regions of *glv10* mutant lines used in this study. (g) Agarose gel images showing PCR amplicons in WT R108 compared to mutants.

777

778

779

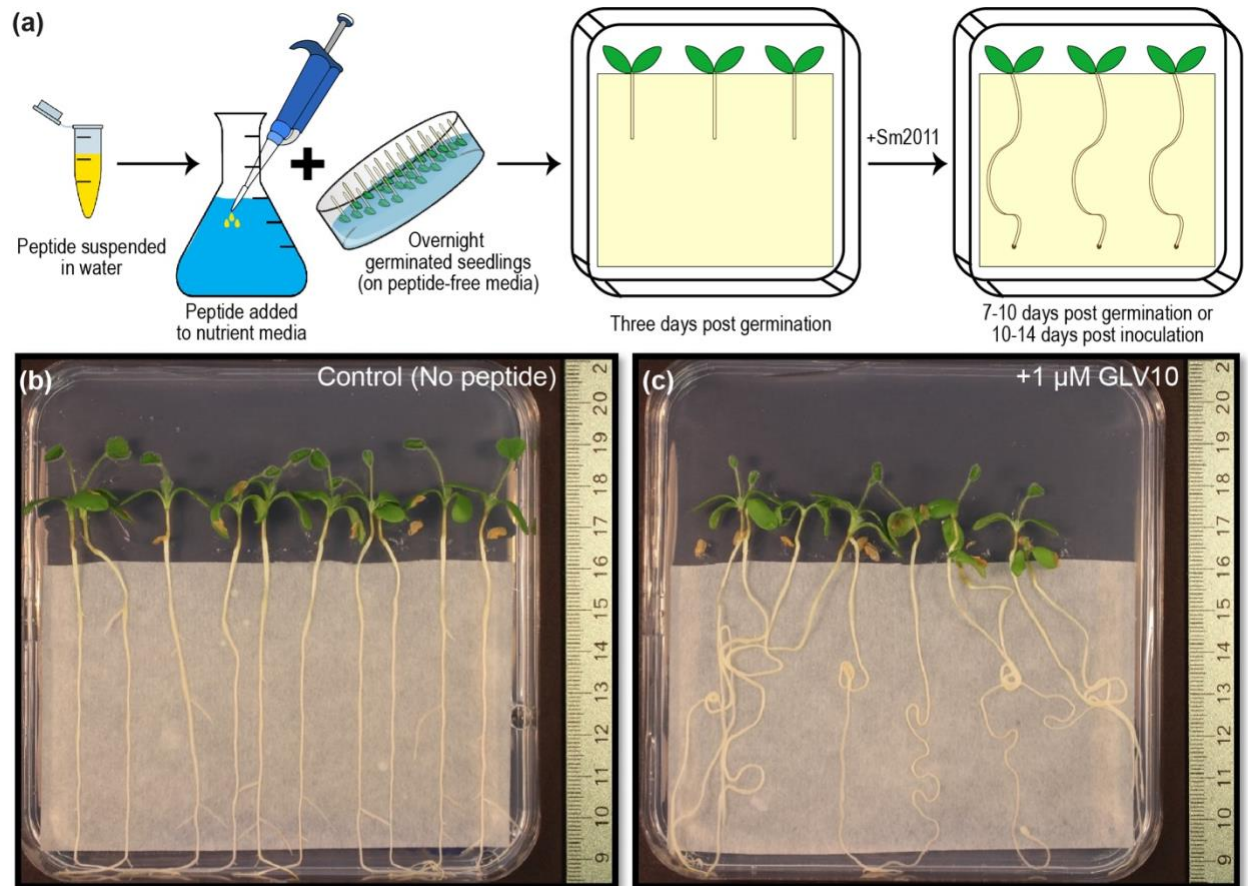

**Figure S4. Effect of GLV10 peptide application on *M. truncatula* root growth.**

(a) Overview of peptide treatment and plant growth setup used in this study. (b, c) Representative images comparing effects of GLV10 peptide application to roots at 1  $\mu$ M concentration compared to untreated roots. Images were taken 10 days post transfer to plates containing 1% Agarose in water.

780

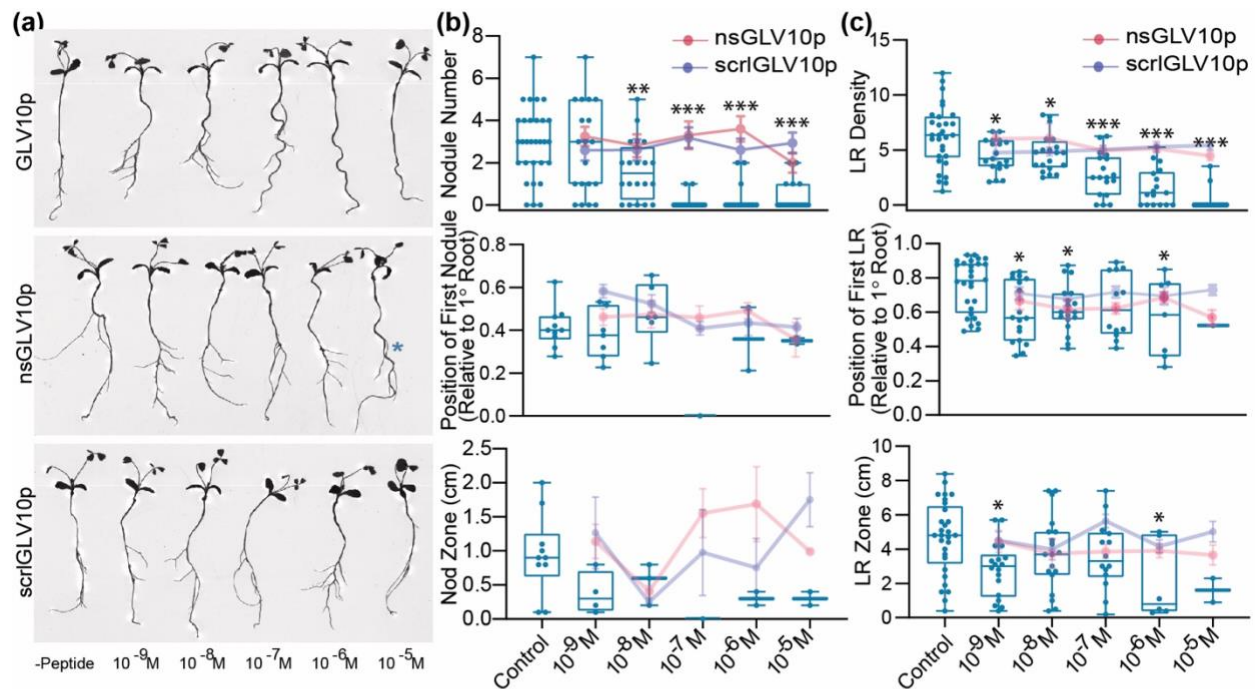

**Supplementary Figure S5. Peptide dilution curve.**

(a) Representative root scans showing seedling morphology 13 days post growth on B & D low-N media containing GLV10p, a modified non-sulfated version of the same peptide (nsGLV10p) and a scrambled version of the peptide (scrGLV10p) at the concentrations indicated. See Supplementary Figure S3 for sequence details. (b) Number of nodules, position of developmentally first formed nodule relative to primary root length and the resulting nodule formation zone 10 days post inoculation with *S. meliloti* strain Rm2011 dsRed at the concentrations of peptides indicated. (c) Density of lateral roots formed, position of developmentally first formed lateral root relative to primary root length and the resulting LR formation zone in the same experiment.

781

782

783

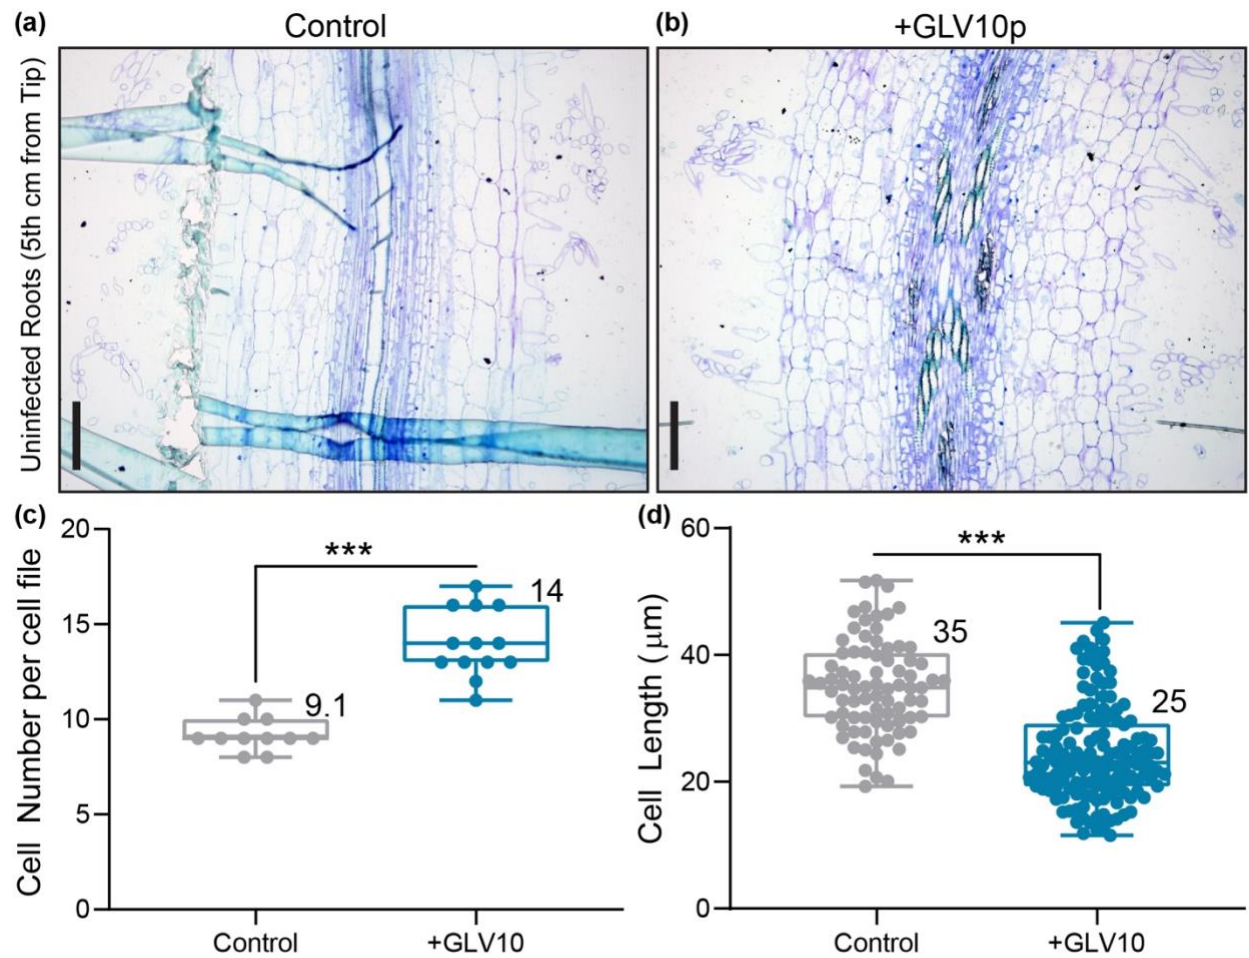

**Figure S6. The synthetic peptide GLV10 affects cell number and cell size in Medicago roots.**

Images show 2.5 μm thick sections of root segments collected four cm below root tip at a 20x magnification. Control roots treated with solvent (a) and roots treated with 1 μM GLV10 peptide (b) for seven days. Scale bars represent 50 μm. Segments from at least eight roots per sample were analyzed. Quantification of data shown in (a,b) using ImageJ. Application of GLV10 peptide increases root length by increasing cell number (c) but decreasing cell size in each cortical cell file (d). Roots were treated with peptide for seven days on plates and compared to untreated roots. Student's t-test \*\*\* $p < 0.001$ . Average values are shown on the shoulder of each box plot.

784  
785

786 **REFERENCES**

787

- 788 **Beemster GT, Baskin TI. 1998.** Analysis of cell division and elongation underlying the  
789 developmental acceleration of root growth in *Arabidopsis thaliana*. *Plant Physiology*  
790 **116**(4): 1515-1526.
- 791 **Boschiero C, Dai X, Lundquist PK, Roy S, Christian de Bang T, Zhang S, Zhuang Z,**  
792 **Torres-Jerez I, Udvardi MK, Scheible W-R, et al. 2020.** MtSSPdb: The *Medicago*  
793 *truncatula* small secreted peptide database. *Plant Physiology* **183**(1): 399-413.
- 794 **Broughton WJ, Dilworth MJ. 1971.** Control of leghaemoglobin synthesis in snake beans. *The*  
795 *Biochemical journal* **125**(4): 1075-1080.
- 796 **Cederholm HM, Benfey PN. 2015.** Distinct sensitivities to phosphate deprivation suggest that  
797 RGF peptides play disparate roles in *Arabidopsis thaliana* root development. *New*  
798 *Phytologist* **207**(3): 683-691.
- 799 **Corcilius L, Hastwell AH, Zhang M, Williams J, Mackay JP, Gresshoff PM, Ferguson BJ,**  
800 **Payne RJ. 2017.** Arabinosylation modulates the growth-regulating activity of the peptide  
801 hormone CLE40a from soybean. *Cell Chemical Biology* **24**(11): 1347-1355. e1347.
- 802 **de Bang TC, Lundquist PK, Dai X, Boschiero C, Zhuang Z, Pant P, Torres-Jerez I, Roy S,**  
803 **Nogales J, Veerappan V, et al. 2017.** Genome-wide identification of *Medicago* peptides  
804 involved in macronutrient responses and nodulation. *Plant Physiology* **175**(4): 1669-  
805 1689.
- 806 **Du Y, Scheres B. 2018.** Lateral root formation and the multiple roles of auxin. *Journal of*  
807 *Experimental Botany* **69**(2): 155-167.
- 808 **Dubrovsky J, Gambetta G, Hernández-Barrera A, Shishkova S, González I. 2006.** Lateral  
809 root initiation in *Arabidopsis*: developmental window, spatial patterning, density and  
810 predictability. *Annals of botany* **97**(5): 903-915.
- 811 **Fernandez A, Drozdzecki A, Hoogewijs K, Vassileva V, Madder A, Beeckman T, Hilson P.**  
812 **2015.** The GLV6/RGF8/CLEL2 peptide regulates early pericycle divisions during lateral  
813 root initiation. *Journal of Experimental Botany* **66**(17): 5245-5256.
- 814 **Fernandez AI, Vangheluwe N, Xu K, Jourquin J, Claus LAN, Morales-Herrera S, Parizot B,**  
815 **De Gernier H, Yu Q, Drozdzecki A, et al. 2020.** GOLVEN peptide signalling through  
816 RGI receptors and MPK6 restricts asymmetric cell division during lateral root initiation.  
817 *Nature Plants* **6**(5): 533-543.
- 818 **Furumizu C, Krabberød AK, Hammerstad M, Alling RM, Wildhagen M, Sawa S, Aalen RB.**  
819 **2021.** The sequenced genomes of nonflowering land plants reveal the innovative  
820 evolutionary history of peptide signaling. *The Plant Cell* **33**(9): 2915-2934.
- 821 **Gibson DG, Young L, Chuang RY, Venter JC, Hutchison CA, 3rd, Smith HO. 2009.**  
822 Enzymatic assembly of DNA molecules up to several hundred kilobases. *Nature*  
823 *Methods* **6**(5): 343-345.
- 824 **Goto H, Okuda S, Mizukami A, Mori H, Sasaki N, Kurihara D, Higashiyama T. 2011.**  
825 Chemical visualization of an attractant peptide, LURE. *Plant and Cell Physiology* **52**(1):  
826 49-58.
- 827 **Hofhuis H, Laskowski M, Du Y, Prasad K, Grigg S, Pinon V, Scheres B. 2013.** Phyllotaxis  
828 and rhizotaxis in *Arabidopsis* are modified by three PLETHORA transcription factors.  
829 *Current Biology* **23**(11): 956-962.
- 830 **Huo X, Schnabel E, Hughes K, Frugoli J. 2006.** RNAi phenotypes and the localization of a  
831 protein:: GUS fusion imply a role for *Medicago truncatula* PIN genes in nodulation.  
832 *Journal of Plant Growth Regulation* **25**(2): 156-165.



- 833 **Imin N, Mohd-Radzman NA, Ogilvie HA, Djordjevic MA. 2013.** The peptide-encoding CEP1  
834 gene modulates lateral root and nodule numbers in *Medicago truncatula*. *Journal of*  
835 *Experimental Botany* **64**(17): 5395-5409.
- 836 **Jones AR, Band LR, Murray JA. 2019.** Double or nothing? Cell division and cell size control.  
837 *Trends in Plant Science* **24**(12): 1083-1093.
- 838 **Laffont C, Ivanovici A, Gautrat P, Brault M, Djordjevic MA, Frugier F. 2020.** The NIN  
839 transcription factor coordinates CEP and CLE signaling peptides that regulate nodulation  
840 antagonistically. *Nature Communications* **11**(1): 3167.
- 841 **Laporte P, Lepage A, Fournier J, Catrice O, Moreau S, Jardinaud M-F, Mun J-H, Larrainzar**  
842 **E, Cook DR, Gamas P. 2014.** The CCAAT box-binding transcription factor NF-YA1  
843 controls rhizobial infection. *Journal of Experimental Botany* **65**(2): 481-494.
- 844 **Laskowski M, ten Tusscher KH. 2017.** Periodic Lateral Root Priming: What Makes It Tick?  
845 *The Plant Cell* **29**(3): 432-444.
- 846 **Leyser O. 2018.** Auxin Signaling. *Plant Physiology* **176**(1): 465-479.
- 847 **Li Q, Li M, Zhang D, Yu L, Yan J, Luo L. 2020.** The peptide-encoding *MtRGF3* gene  
848 negatively regulates nodulation of *Medicago truncatula*. *Biochemical and Biophysical*  
849 *Research Communications* **523**(1): 66-71.
- 850 **Lynch JP. 2019.** Root phenotypes for improved nutrient capture: an underexploited opportunity  
851 for global agriculture. *New Phytologist* **223**(2): 548-564.
- 852 **Maekawa T, Kusakabe M, Shimoda Y, Sato S, Tabata S, Murooka Y, Hayashi M. 2008.**  
853 Polyubiquitin promoter-based binary vectors for overexpression and gene silencing in  
854 *Lotus japonicus*. *Molecular Plant-Microbe Interactions* **21**(4): 375-382.
- 855 **Matsuzaki Y, Ogawa-Ohnishi M, Mori A, Matsubayashi Y. 2010.** Secreted peptide signals  
856 required for maintenance of root stem cell niche in *Arabidopsis*. *Science* **329**(5995):  
857 1065-1067.
- 858 **Matsuzaki Y, Ogawa-Ohnishi M, Mori A, Matsubayashi Y. 2010.** Secreted peptide signals  
859 required for maintenance of root stem cell niche in *Arabidopsis*. *Science* **329**(5995):  
860 1065-1067.
- 861 **Meng L, Buchanan BB, Feldman LJ, Luan S. 2012.** CLE-like (CLEL) peptides control the  
862 pattern of root growth and lateral root development in *Arabidopsis*. *Proceedings of the*  
863 *National Academy of Sciences* **109**(5): 1760-1765.
- 864 **Mens C, Hastwell AH, Su H, Gresshoff PM, Mathesius U, Ferguson BJ. 2021.**  
865 Characterisation of *Medicago truncatula* CLE34 and CLE35 in nitrate and rhizobia  
866 regulation of nodulation. *New Phytologist* **229**(5): 2525-2534.
- 867 **Michniewicz M, Ho C-H, Enders TA, Floro E, Damodaran S, Gunther LK, Powers SK, Frick**  
868 **EM, Topp CN, Frommer WB. 2019.** TRANSPORTER OF IBA1 links auxin and cytokinin  
869 to influence root architecture. *Developmental Cell* **50**(5): 599-609. e594.
- 870 **Mohd-Radzman NA, Djordjevic MA, Imin N. 2013.** Nitrogen modulation of legume root  
871 architecture signaling pathways involves phytohormones and small regulatory  
872 molecules. *Frontiers in Plant Science* **4**: 385.
- 873 **Moreau C, Gautrat P, Frugier F. 2021.** Nitrate-induced CLE35 signaling peptides inhibit  
874 nodulation through the SUNN receptor and miR2111 repression. *Plant Physiology*.
- 875 **Mortier V, Den Herder G, Whitford R, Van de Velde W, Rombauts S, D'haeseleer K,**  
876 **Holsters M, Goormachtig S. 2010.** CLE Peptides Control *Medicago truncatula*  
877 nodulation locally and systemically. *Plant Physiology* **153**(1): 222-237.
- 878 **Nishida H, Tanaka S, Handa Y, Ito M, Sakamoto Y, Matsunaga S, Betsuyaku S, Miura K,**  
879 **Soyano T, Kawaguchi M, et al. 2018.** A NIN-LIKE PROTEIN mediates nitrate-induced  
880 control of root nodule symbiosis in *Lotus japonicus*. *Nature Communications* **9**(1): 499.
- 881 **Okamoto S, Shinohara H, Mori T, Matsubayashi Y, Kawaguchi M. 2013.** Root-derived CLE  
882 glycopeptides control nodulation by direct binding to HAR1 receptor kinase. *Nature*  
883 *Communications* **4**(1): 2191.

- 884 **Okuda S, Tsutsui H, Shiina K, Sprunck S, Takeuchi H, Yui R, Kasahara RD, Hamamura Y,**  
885 **Mizukami A, Susaki D. 2009.** Defensin-like polypeptide LUREs are pollen tube  
886 attractants secreted from synergid cells. *Nature* **458**(7236): 357-361.
- 887 **Penmetsa RV, Cook DR. 1997.** A legume ethylene-insensitive mutant hyperinfected by its  
888 rhizobial symbiont. *Science* **275**(5299): 527-530.
- 889 **Penmetsa RV, Frugoli JA, Smith LS, Long SR, Cook DR. 2003.** Dual genetic pathways  
890 controlling nodule number in *Medicago truncatula*. *Plant Physiology* **131**(3): 998-1008.
- 891 **Quandt HJ, Pühler A, Broer I. 1993.** Transgenic root nodules of *Vicia hirsuta*: a fast and  
892 efficient system for the study of gene expression in indeterminate-type nodules. *MPMI-*  
893 *Molecular Plant Microbe Interactions* **6**(6): 699-706.
- 894 **Ropelewski AJ, Nicholas Jr HB, Deerfield DW. 2003.** Mathematically complete nucleotide  
895 and protein sequence searching using search. *Current protocols in bioinformatics* **4**(1):  
896 3.10. 11-13.10. 12.
- 897 **Roy S, Liu W, Nandety RS, Crook A, Mysore KS, Pislariu CI, Frugoli J, Dickstein R,**  
898 **Udvardi MK. 2020.** Celebrating 20 years of genetic discoveries in legume nodulation  
899 and symbiotic nitrogen fixation. *The Plant Cell* **32**(1): 15-41.
- 900 **Roy S, Muller LM. 2022.** A rulebook for peptide control of legume-microbe endosymbioses.  
901 *Trends Plant Sci.*
- 902 **Roy S, Robson F, Lilley J, Liu C-W, Cheng X, Wen J, Walker S, Sun J, Cousins D, Bone C,**  
903 **et al. 2017.** MtLAX2, a functional homologue of the Arabidopsis auxin influx transporter  
904 AUX1, is required for nodule organogenesis. *Plant Physiology* **174**(1): 326-338.
- 905 **Schiessl K, Lilley JLS, Lee T, Tamvakis I, Kohlen W, Bailey PC, Thomas A, Luptak J,**  
906 **Ramakrishnan K, Carpenter MD, et al. 2019.** NODULE INCEPTION recruits the lateral  
907 root developmental program for symbiotic nodule organogenesis in *Medicago truncatula*.  
908 *Current Biology* **29**(21): 3657-3668.e3655.
- 909 **Shinohara H, Mori A, Yasue N, Sumida K, Matsubayashi Y. 2016.** Identification of three  
910 LRR-RKs involved in perception of root meristem growth factor in *Arabidopsis*.  
911 *Proceedings of the National Academy of Sciences* **113**(14): 3897-3902.
- 912 **Tadege M, Wen J, He J, Tu H, Kwak Y, Eschstruth A, Cayrel A, Endre G, Zhao PX,**  
913 **Chabaud M. 2008.** Large-scale insertional mutagenesis using the *Tnt1* retrotransposon  
914 in the model legume *Medicago truncatula*. *The Plant Journal* **54**(2): 335-347.
- 915 **Wang C, Yu H, Zhang Z, Yu L, Xu X, Hong Z, Luo L. 2015.** Phytosulfokine Is Involved in  
916 Positive Regulation of *Lotus japonicus* Nodulation. *Molecular Plant Microbe Interactions*  
917 **28**(8): 847-855.
- 918 **Whitford R, Fernandez A, Tejos R, Pérez Amparo C, Kleine-Vehn J, Vanneste S,**  
919 **Drozdzecki A, Leitner J, Abas L, Aerts M, et al. 2012.** GOLVEN secretory peptides  
920 regulate auxin carrier turnover during plant gravitropic responses. *Developmental Cell*  
921 **22**(3): 678-685.
- 922 **Yoshida C, Funayama-Noguchi S, Kawaguchi M. 2010.** plenty, a novel hypernodulation  
923 mutant in *Lotus japonicus*. *Plant and Cell Physiology* **51**(9): 1425-1435.
- 924 **Zhu F, Deng J, Chen H, Liu P, Zheng L, Ye Q, Li R, Brault M, Wen J, Frugier F, et al. 2020.**  
925 A CEP Peptide Receptor-Like Kinase Regulates Auxin Biosynthesis and Ethylene  
926 Signaling to Coordinate Root Growth and Symbiotic Nodulation in *Medicago truncatula*.  
927 *The Plant Cell* **32**(9): 2855-2877.
- 928
